# Supplementary material for: Asymmetric transfer hydrogenation of aryl ketoesters with a chiral double-chain surfactant-type catalyst in water
Source: Royal Society of Chemistry journal article supplement (doi:10.1039/c7gc01639e), 2017-01-01
Supplement: c7gc01639e1.pdf [file c7gc01639e1.pdf]

## Supporting Information

# Asymmetric transfer hydrogenation of aryl ketoesters with chiral double-chain surfactant-type catalyst in water

Jiahong Li, Zechao Lin, Qingfei Huang, Qiwei Wang, Lei Tang, Jin Zhu, and Jingen Deng,\*

## Contents

|                                                                                                                     |    |
|---------------------------------------------------------------------------------------------------------------------|----|
| 1. General Methods.....                                                                                             | S2 |
| 2. Effect of the hydrogen sources on the ATH of ethyl 3-oxo-3-phenylpropanoate.....                                 | S2 |
| 3. Effect of the HCOONa / HCOOH on the ATH of ethyl 3-oxo-3-phenylpropanoate.....                                   | S2 |
| 4. Effect of the amount of H <sub>2</sub> O on the ATH of ethyl 3-oxo-3-phenylpropanoate.....                       | S3 |
| 5. Effect of the temperature on the ATH of ethyl 3-oxo-3-phenylpropanoate.....                                      | S3 |
| 6. Effect of ligands and metal precursors on the ATH of ethyl 3-oxo-3-phenylpropanoate.....                         | S4 |
| 7. Procedure for TEM analyses.....                                                                                  | S4 |
| 8. Proposed mechanism of reduction of aromatic ketones in the nano-aggregates formed from the catalyst L4-Rh-H..... | S5 |
| 9. Syntheses of ligands.....                                                                                        | S5 |
| 10. Data of the ligands and products.....                                                                           | S9 |

## 1. General Methods.

All commercially available reagents were used as received without further purification. All organic solvents used in the reactions were distilled from appropriate drying agents prior to use. All reactions were performed in air.  $^1\text{H}$  NMR and  $^{13}\text{C}$  NMR were acquired at 300 MHz (or 400 MHz) and 75 MHz (or 100 MHz) respectively. Optical rotation were recorded on PE polarimeter 341. Enantiomeric excesses were determined by GC or HPLC analysis. Electrospray ionization high-resolution mass spectra (ESI-HRMS) were recorded on a Bruke P-SIMS-Gly FT-ICR mass spectrometer.

### Typical procedure for the asymmetric transfer hydrogenation in water.

All the reductions were performed in the air during the entire operation including catalyst preparation (using distilled water without degassing).

$[\text{Cp}^*\text{RhCl}_2]_2$  (1.3 mg 0.002 mmol) and ligand (0.004 mmol) were dissolved in 5 mL of  $\text{H}_2\text{O}$ . After stirring at 40 °C for 2 h, the solution was cooled to 25 °C.  $\text{HCOONa}$  (2 mmol) and ketoesters (0.4 mmol) were added to the solution. Then the mixture was allowed to react at 30 °C for a certain period of time. The organic phase was extracted with EtOAc (5 mL $\times$ 3).

## 2. Effect of the hydrogen sources on the ATH of ethyl 3-oxo-3-phenylpropanoate.

**Table S1.** Effect of the [H] on ATH of ethyl 3-oxo-3-phenylpropanoate catalyzed by Rh–L4 Complex. <sup>a</sup>

| 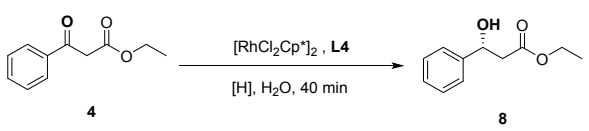 |                              |                        |                       |
|-------------------------------------------------------------------------------------|------------------------------|------------------------|-----------------------|
| entry                                                                               | [H]                          | conv. <sup>b</sup> (%) | e.e. <sup>c</sup> (%) |
| 1                                                                                   | $\text{HCOONa}$              | 84                     | 96                    |
| 2                                                                                   | $\text{HCOOK}$               | 69                     | 96                    |
| 3                                                                                   | $\text{HCOONH}_4$            | 5                      | N.D.                  |
| 4                                                                                   | $(\text{CH}_3)_2\text{CHOH}$ | N.R.                   | -                     |
| 5                                                                                   | TEAF( 0.1 mL)                | N.R.                   | -                     |

<sup>a</sup> Reaction conditions: 0.004 mmol of **L4**, 0.002 mmol of metal precursor, 5.0 mL of  $\text{H}_2\text{O}$ , 2 mmol of [H], 0.4 mmol of ethyl 3-oxo-3-phenylpropanoate, S/C=100, 40 min, 30 °C. <sup>b</sup> Conversion was determined by  $^1\text{H}$ NMR of the unpurified reaction mixture. <sup>c</sup> Enantiomeric excess was determined by HPLC analysis.

## 3. Effect of the $\text{HCOONa}$ / $\text{HCOOH}$ on the ATH of ethyl 3-oxo-3-phenylpropanoate.

**Table S2.** Effect of the pH on ATH of ethyl 3-oxo-3-phenylpropanoate Catalyzed by Rh–L4 Complex. <sup>a</sup>

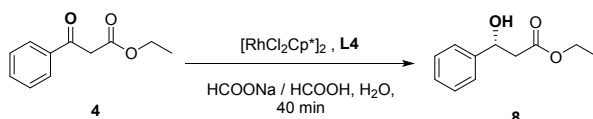

| entry | HCOONa / HCOOH     | pH <sup>b</sup> | pH <sup>c</sup> | conv. <sup>d</sup> (%) | e.e. <sup>e</sup> (%) |
|-------|--------------------|-----------------|-----------------|------------------------|-----------------------|
| 1     | 1.82 / 0.18        | 4.30            | 6.53            | 53                     | 94                    |
| 2     | 1.961 / 0.039      | 4.88            | 7.01            | 78                     | 95                    |
| 3     | 2 / 0              | 7.24            | 8.13            | 84                     | 96                    |
| 4     | 2 / 0 <sup>f</sup> | 10.91           | 9.83            | 20                     | 94                    |

<sup>a</sup> Reaction conditions: 0.004 mmol of L4, 0.002 mmol of [Cp\*RhCl<sub>2</sub>]<sub>2</sub>, 5 mL of H<sub>2</sub>O, HCOONa / HCOOH (2 mmol), 0.4 mmol of ethyl 3-oxo-3-phenylpropanoate, S/C=100, 40 min, 30 °C. <sup>b</sup> Initial pH value. <sup>c</sup> pH value after reaction. <sup>d</sup> Conversion was determined by <sup>1</sup>HNMR of the unpurified reaction mixture. <sup>e</sup> Enantiomeric excess was determined by HPLC analysis. <sup>f</sup> Extra 0.5 mmol of Na<sub>2</sub>CO<sub>3</sub> was added.

#### 4. Effect of the amount of H<sub>2</sub>O on the ATH of ethyl 3-oxo-3-phenylpropanoate.

**Table S3.** Effect of the amount of H<sub>2</sub>O on ATH of ethyl 3-oxo-3-phenylpropanoate Catalyzed by Rh–L4 Complex. <sup>a</sup>

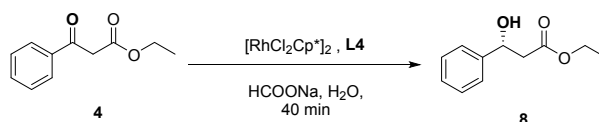

| entry | H <sub>2</sub> O | conv. <sup>b</sup> (%) | e.e. <sup>c</sup> (%) |
|-------|------------------|------------------------|-----------------------|
| 1     | 3 mL             | 80                     | 96                    |
| 2     | 5 mL             | 84                     | 96                    |
| 3     | 10 mL            | 77                     | 96                    |
| 4     | 20 mL            | 68                     | 96                    |

<sup>a</sup> Reaction conditions: 0.004 mmol of L4, 0.002 mmol of [Cp\*RhCl<sub>2</sub>]<sub>2</sub>, 5 mL of H<sub>2</sub>O, 2 mmol of HCOONa, 0.4 mmol of ethyl 3-oxo-3-phenylpropanoate, S/C=100, 40 min, 30 °C. <sup>b</sup> Conversion was determined by <sup>1</sup>HNMR of the unpurified reaction mixture. <sup>c</sup> Enantiomeric excess was determined by HPLC analysis.

#### 5. Effect of ligands and metal precursors on the ATH of ethyl 3-oxo-3-phenylpropanoate.

**Table S4.** ATH of ethyl 3-oxo-3-phenylpropanoate with different ligands and metal precursors

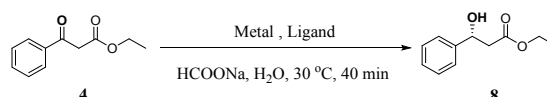

| entry | ligand | metal precursor                      | conv. <sup>b</sup> (%) | e.e. <sup>c</sup> (%) |
|-------|--------|--------------------------------------|------------------------|-----------------------|
| 1     | L1     | [RhCl <sub>2</sub> Cp*] <sub>2</sub> | 60                     | 95                    |

|   |           |                                      |    |    |
|---|-----------|--------------------------------------|----|----|
| 2 | <b>L2</b> | $[\text{RhCl}_2\text{Cp}^*]_2$       | 56 | 96 |
| 3 | <b>L3</b> | $[\text{RhCl}_2\text{Cp}^*]_2$       | 69 | 96 |
| 4 | <b>L4</b> | $[\text{RhCl}_2\text{Cp}^*]_2$       | 84 | 96 |
| 5 | <b>L4</b> | $[\text{RuCl}_2(\text{p-cymene})]_2$ | 16 | 92 |
| 6 | <b>L4</b> | $[\text{Cp}^*\text{IrCl}_2]_2$       | 30 | 94 |

<sup>a</sup> Reaction conditions: 0.004 mmol of ligand, 0.002 mmol of metal precursor, 5.0 mL of H<sub>2</sub>O, 2 mmol of HCOONa, 0.4 mmol of ethyl 3-oxo-3-phenylpropanoate, S/C=100, 40 min, 30 °C. <sup>b</sup> Conversion was determined by <sup>1</sup>HNMR of the unpurified reaction mixture <sup>c</sup> Enantiomeric excess was determined by HPLC analysis.

## 6. Effect of the temperature on the ATH of ethyl 3-oxo-3-phenylpropanoate.

**Table S5.** Effect of the temperature on ATH of ethyl 3-oxo-3-phenylpropanoate Catalyzed by Rh–L4 Complex. <sup>a</sup>

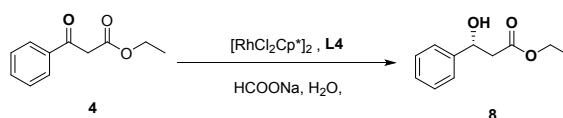

| entry | T (°C) | t (h)     | conv. <sup>b</sup> (%) | e.e. <sup>c</sup> (%) |
|-------|--------|-----------|------------------------|-----------------------|
| 1     | 10     | 20 (0.5)  | 99 (50)                | 98 (98)               |
| 2     | 20     | 6 (0.5)   | 99 (70)                | 97 (97)               |
| 3     | 30     | 2 (0.5)   | 99 (75)                | 96 (96)               |
| 4     | 40     | 1.5 (0.5) | 99 (84)                | 96 (96)               |
| 5     | 50     | 1.5 (0.5) | 99 (99)                | 95 (95)               |

<sup>a</sup> Reaction conditions: 0.004 mmol of L4, 0.002 mmol of  $[\text{Cp}^*\text{RhCl}_2]_2$ , 5 mL of H<sub>2</sub>O, 2 mmol of HCOONa, 0.4 mmol of ethyl 3-oxo-3-phenylpropanoate, S/C=100. <sup>b</sup> Conversion was determined by <sup>1</sup>HNMR of the unpurified reaction mixture. <sup>c</sup> Enantiomeric excess was determined by HPLC analysis.

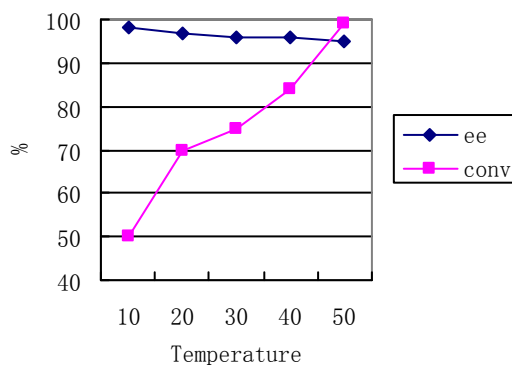

## 7. Procedure for TEM analyses.

- (1) Preparation of samples for catalyst **L4-Rh-H**:  $[\text{Cp}^*\text{RhCl}_2]_2$  (1.3 mg 0.002 mmol) and ligand **L4** (0.004 mmol) were dissolved in 5 mL of  $\text{H}_2\text{O}$ . The mixture was stirred at  $40^\circ\text{C}$  for 2 h. The solution was cooled to  $20^\circ\text{C}$ .  $\text{HCOONa}$  (136 mg 2.0 mmol) was added to the solution. Then the solution was stirred at  $20^\circ\text{C}$  for 8 h.
- (2) A drop of the colloidal aqueous suspensions was deposited on a carbon-coated copper grid. Then the excess solution was immediately removed with the help of filter paper. The grid was dried in air and then observed by TEM

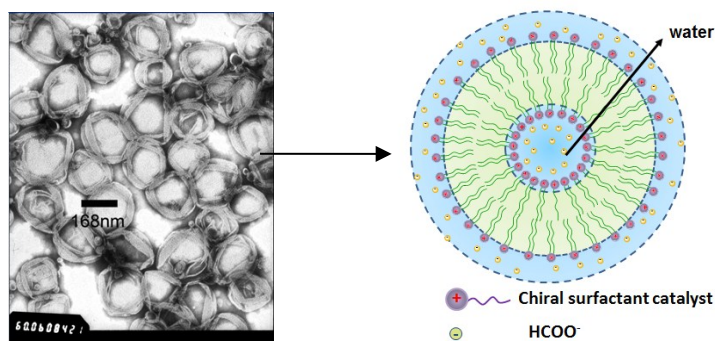

**Figure S1.** TEM images of nano-aggregates of catalyst **L4-Rh-H** in water

## 8. Proposed mechanism of reduction of aromatic ketones in the nano-aggregates formed from the catalyst **L4-Rh-H**.

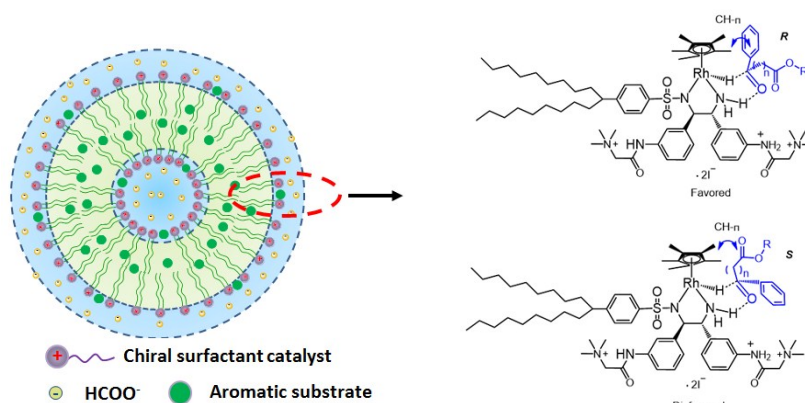

**Figure S2.** Proposed mechanism of reduction of aromatic ketones in the nano-aggregates formed from the catalyst **L4-Rh-H**

## 9. Syntheses of ligands

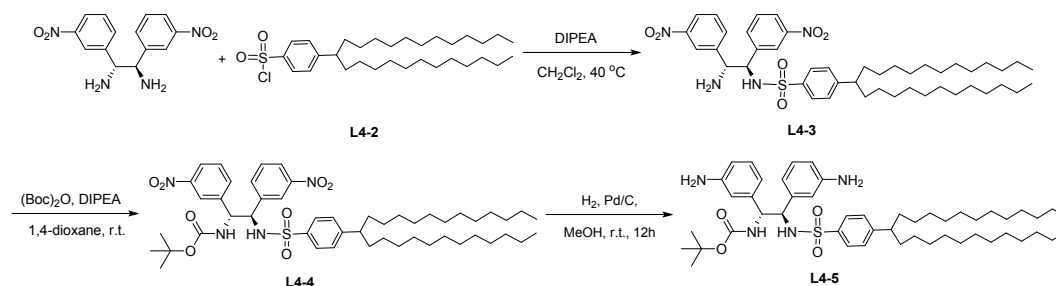

**Scheme S1.** Synthesis of **L4-5**.

## 1) Synthesis of L4-5 (scheme S1).<sup>[1]</sup>

### *tert*-Butyl- (1*R*,2*R*)-1,2-bis(3-aminophenyl)-2-(4-(tricosan-12-yl)phenylsulfonamido)ethylcarbamate L4-5.

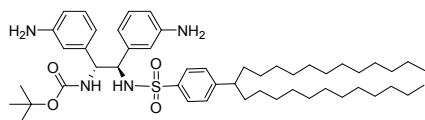

Transparent oil.  $[\alpha]_D^{20} = -2.3$  ( $c=0.52$ ,  $\text{CH}_2\text{Cl}_2$ ); ESI-HRMS  $[\text{M}+\text{Na}]^+$  calcd for  $\text{C}_{37}\text{H}_{54}\text{N}_4\text{NaO}_4\text{S}$ : 855.5798, found: 855.5760;  $^1\text{H}$  NMR (300 MHz,  $\text{CDCl}_3$ )  $\delta$  7.50 (d, 2H,  $J = 8.2$  Hz), 7.04 (d, 2H,  $J = 8.4$  Hz), 6.95 (t, 1H,  $J = 7.7$  Hz), 6.72 (t, 1H,  $J = 7.8$  Hz), 6.49 (d, 1H,  $J = 8.2$  Hz), 6.38-6.31 (m, 3H), 6.23 (s, 1H), 6.14 (d, 1H,  $J = 7.8$  Hz), 5.94 (brs, 1H), 5.15 (brs, 1H), 4.68 (t, 1H,  $J = 8.3$  Hz), 4.46 (t, 1H,  $J = 9.4$  Hz), 3.56-3.43 (brs, 4H), 2.45 (brs, 1H), 1.59-1.53 (m, 4H), 1.47 (s, 9H), 1.29-1.01 (m, 40H), 0.90-0.85 (m, 6H).

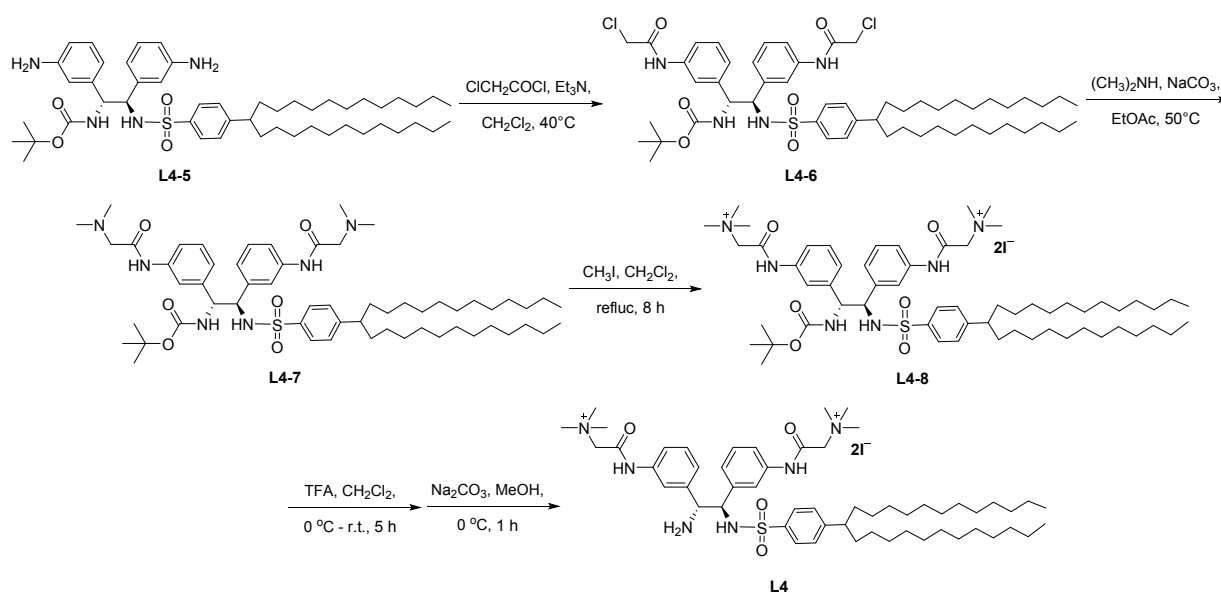

Scheme S2. Synthesis of **L4**.

## 2) Synthesis of L4 (scheme S2).

To a stirred solution of **L4-5** (508 mg, 0.826 mmol) and chloroacetyl chloride (276 mg, 2.440 mmol) in  $\text{CH}_2\text{Cl}_2$  (50 mL) was added dropwise a solution of  $\text{Et}_3\text{N}$  (0.85 mL, 6.10 mmol) in  $\text{CH}_2\text{Cl}_2$  (10 mL) at room temperature. The mixture was stirred at 40 °C until the **L4-5** was completely disappeared by TLC. After being washed with saturated solution of  $\text{Na}_2\text{CO}_3$  (50 mL $\times$ 1), and brine (50 mL), the organic layer was dried over  $\text{Na}_2\text{SO}_4$ . After removal of the solvent under reduced pressure to afford ligand **L4-6** as a colorless transparent jelly. And the product was directly used in the next reaction.

To a stirred solution of **L4-6** (400 mg, 0.406 mmol) and  $\text{Na}_2\text{CO}_3$  (215 mg, 2.030 mmol) in EtOAc (50 mL) was added a solution of dimethylamine (366 mg, 8.12 mmol) in EtOAc (10 mL) at 0 °C. The mixture was stirred at 50 °C in sealed tube until the **L4-6** was completely disappeared by TLC. After being washed with saturated solution of  $\text{Na}_2\text{CO}_3$  (50 mL $\times$ 1), and brine (50 mL), the organic layer was dried over  $\text{Na}_2\text{SO}_4$ . After removal of the solvent under reduced pressure to afford ligand **L4-7** as a colorless transparent jelly. And the product was directly used in the next reaction.

To a stirred solution of **L4-7** (300 mg, 0.299 mmol) and  $\text{CH}_3\text{I}$  (0.2 mL) in  $\text{CH}_2\text{Cl}_2$  (30 mL). The mixture was stirred at 40 °C in sealed tube until the **L4-7** was completely disappeared by TLC. After removal of the solvent under reduced pressure to afford ligand **L4-8** as a colorless transparent jelly. And the product was directly used in the next reaction.

To a stirred solution of **L4-8** (300 mg, 0.233 mmol) in  $\text{CH}_2\text{Cl}_2$  (20 mL) cooled with an ice bath was added TFA (10 mL). The mixture was stirred for 5 h. After removal of the solvent under reduced pressure, the residue was redissolved in 20 mL of methanol. Then the solution was cooled with an ice bath and  $\text{Na}_2\text{CO}_3$  (494 mg, 4.66 mmol) was added. The mixture was stirred at

0°C for 1 hour. The insoluble solid was removed by filtration. After the solvent was removed by reduce pressure. After removal of the solvent under reduced pressure, 261 mg (94%) of ligand **L4** was obtained as a colourless oil.

**2,2'-(3,3'-((1R,2R)-1-amino-2-(4-(tricosan-12-yl)phenylsulfonamido)ethane-1,2-diyl)bis(3,1-phenylene))bis(azanediyl)bis(N,N,N-trimethyl-2-oxoethanaminium) diiodide **L4** :**

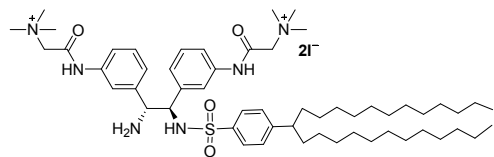

Colorless oil,  $[\alpha]_D^{20} = +60.9$  ( $c = 0.83$ ,  $\text{CH}_3\text{OH}$ ); ESI-HRMS  $[\text{M}-2\text{I}]^+$  calcd for  $\text{C}_{55}\text{H}_{92}\text{N}_6\text{O}_4\text{S}$  : 932.6890, found: 932.6928;  $^1\text{H}$  NMR (300 MHz,  $\text{CD}_3\text{OD}$ )  $\delta$ : 7.68-7.62 (m, 5H), 7.54 (s, 1H), 7.31-7.25 (m, 4H), 7.03 (d,  $J = 8.0$  Hz, 1H), 6.78 (d,  $J = 7.6$  Hz, 1H), 4.95 (s, 1H), 4.53 (d,  $J = 8.0$  Hz, 1H), 4.35 (d,  $J = 6.0$  Hz, 4H), 3.41 (s, 9H), 3.39 (s, 9H), 2.67-2.58 (m, 1H), 1.70-1.2 (m, 44H), 0.88

(q,  $J = 6.6$  Hz, 6H);  $^{13}\text{C}$  NMR (75 MHz,  $\text{CDCl}_3$ ) : 163.3, 157.0, 154.7, 143.1, 142.4, 139.6, 139.4, 137.4, 131.0, 130.8, 129.4, 129.2, 123.7, 122.6, 121.4, 119.9, 119.0, 70.1, 67.9, 65.9, 65.9, 63.1, 55.0, 49.9, 49.6, 49.3, 49.2, 49.0, 48.8, 48.5, 48.2, 47.2, 37.8, 37.7, 33.1, 30.8, 30.6, 30.5, 28.7, 23.8, 14.5.

**2,2'-(3,3'-(1-amino-2-(4-dodecylphenylsulfonamido)ethane-1,2-diyl)bis(3,1-phenylene))bis(azanediyl)bis(N,N,N-trimethyl-2-oxoethanaminium) diiodide **L2** :**

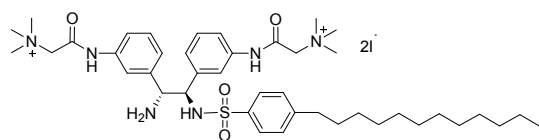

Colorless oil,  $[\alpha]_D^{20} = +11.7$  ( $c = 0.51$ ,  $\text{CH}_3\text{OH}$ ); ESI-HRMS  $[\text{M}-2\text{I}]^+$  calcd for  $\text{C}_{42}\text{H}_{66}\text{N}_6\text{O}_4\text{S}$  : 750.4855, found: 750.4856;  $^1\text{H}$  NMR (300 MHz,  $\text{CD}_3\text{OD}$ )  $\delta$ : 7.59 (s, 1H), 7.53-7.47 (m, 3H), 7.29-7.18 (m, 3H), 6.81 (q,  $J = 7.9$  Hz, 1H), 6.56 (d,  $J = 6.5$  Hz, 1H), 4.68 (d,  $J = 11.0$  Hz, 1H), 4.57 (d,  $J = 11.0$  Hz, 1H), 4.45 (s, 4H), 3.45 (s, 9H), 3.43 (s,

9H), 2.53 (q,  $J = 7.6$  Hz, 2H), 1.50 (q,  $J = 6.6$  Hz, 2H), 1.28 (bs, 20H), 0.89 (q,  $J = 6.7$  Hz, 3H);  $^{13}\text{C}$  NMR (75 MHz,  $\text{CDCl}_3$ ) : 163.2, 162.9, 149.5, 139.2, 138.6, 138.4, 137.2, 135.5, 130.9, 130.0, 129.8, 128.3, 125.5, 125.3, 122.3, 122.2, 121.2, 121.2, 120.9, 120.8, 120.8, 66.0, 65.9, 62.8, 60.3, 55.2, 36.6, 33.0, 32.4, 32.3, 30.7, 30.7, 30.5, 30.4, 30.4, 30.2, 23.7, 23.7, 14.5, 14.4.

**3, 3'-[(1R, 2R)- (1-Amino-2-(4-(tricosan-12-yl) phenylsulfonamido) ethane-1, 2-diyl] bis (N, N, N-trimethylbenzenaminium) diiodide **L3** :**

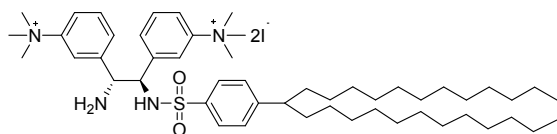

Colorless oil,  $[\alpha]_D^{20} = +23.7$  ( $c = 0.51$ ,  $\text{CH}_3\text{OH}$ ); ESI-HRMS  $[\text{M}-2\text{I}]^+$  calcd for  $\text{C}_{51}\text{H}_{86}\text{N}_4\text{O}_2\text{S}$  : 818.6461, found: 818.6478;  $^1\text{H}$  NMR (400 MHz,  $\text{CD}_3\text{OD}$ )  $\delta$ : 8.21 (s, 1H), 8.02 (s, 1H), 7.87-7.84 (m, 2H), 7.68 (m, 4H), 7.56-7.54 (m, 1H), 7.17-7.07 (m, 4H), 5.15 (s, 2H), 3.60 (s,

9H), 3.56 (s, 9H), 2.48 (brs, 1H), 1.60-1.53 (brs, 2H), 1.43-1.37 (brs, 2H), 1.35-0.98 (m, 40H), 0.90-0.87 (m, 6H);  $^{13}\text{C}$  NMR (75 MHz,  $\text{CDCl}_3$ ) : 153.4, 148.7, 148.4, 140.2, 139.2, 137.7, 132.5, 131.8, 131.6, 131.5, 129.3, 128.9, 128.3, 122.2, 121.0, 120.7, 61.7, 59.6, 58.0, 57.9, 57.8, 46.6, 37.4, 37.3, 33.1, 30.8, 30.7, 30.6, 30.5, 28.4, 23.7, 14.5.

**Ethyl 3-oxo-3-(4-chlorophenyl)propanoate (7c)**

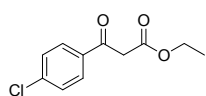

According to the general procedure to yield Ethyl 3-oxo-3-(4-chlorophenyl)propanoate as yellow oil.  $^1\text{H}$ -NMR (300MHz,  $\text{CDCl}_3$ ):  $\delta$  7.88 (d,  $J = 8.6$  Hz, 2H), 7.45 (d,  $J = 8.5$  Hz, 2H), 4.29-4.17 (m, 2H), 3.95 (s, 2H), 1.24 (t,  $J = 7.1$  Hz, 3H), 5.62 (s, 1 H, enol-CH=C), 12.56 (s, 1 H, enol-OH) ppm.

**Ethyl 3-oxo-3-(2-chlorophenyl)propanoate (7d)**

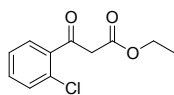

According to the general procedure to yield Ethyl 3-oxo-3-(4-chlorophenyl)propanoate as yellow oil. <sup>1</sup>H-NMR (300MHz, CDCl<sub>3</sub>): δ 7.60 (d, *J* = 7.4 Hz, 2H), 7.43-7.41 (m, 2H), 7.37-7.31 (m, 1H), 4.18 (q, *J* = 7.1 Hz, 2H), 4.03 (s, 2H), 1.23 (t, *J* = 7.1 Hz, 3H), 5.54 (s, 1 H, enol-CH=C), 12.45 (s, 1 H, enol-OH) ppm.

#### Ethyl 3-oxo-3-(3-chlorophenyl)propanoate (7e)

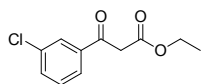

According to the general procedure to yield Ethyl 3-oxo-3-(3-chlorophenyl)propanoate as yellow oil. <sup>1</sup>H-NMR (300MHz, CDCl<sub>3</sub>): δ 7.91 (s, 1H), 7.80 (d, *J* = 7.8 Hz, 1H), 7.56 (d, *J* = 8.0 Hz, 1H), 7.44-7.34 (m, 1H), 4.30-4.17 (m, 2H), 3.95 (s, 2H), 1.25 (t, *J* = 7.2 Hz, 3H), 5.64 (s, 1 H, enol-CH=C), 12.54 (s, 1 H, enol-OH) ppm.

#### Ethyl 3-(4-bromophenyl)-3-oxopropanoate (7f)

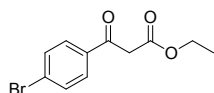

According to the general procedure to yield Ethyl 3-(4-bromophenyl)-3-oxopropanoate as yellow oil. <sup>1</sup>H-NMR (300MHz, CDCl<sub>3</sub>): δ 7.81 (d, *J* = 8.4 Hz, 2H), 7.64 (d, *J* = 8.5 Hz, 2H), 4.21 (q, *J* = 7.1 Hz, 2H), 3.95 (s, 2H), 1.26 (t, *J* = 7.1 Hz, 3H), 5.64 (s, 1 H, enol-CH=C), 12.56 (s, 1 H, enol-OH) ppm.

#### Ethyl 3-oxo-3-(4-methoxyphenyl)propanoate (7g)

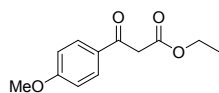

According to the general procedure to yield Ethyl 3-oxo-3-(4-methoxyphenyl)propanoate as yellow oil. <sup>1</sup>H-NMR (300MHz, CDCl<sub>3</sub>): δ 7.91 (d, *J* = 8.9 Hz, 2H), 6.92 (d, *J* = 8.9 Hz, 2H), 4.19 (q, *J* = 7.1 Hz, 2H), 3.92 (s, 2H), 3.85 (s, 3H), 1.24 (t, *J* = 7.1 Hz, 3H), 5.56 (s, 1 H, enol-CH=C), 12.62 (s, 1 H, enol-OH) ppm.

#### Ethyl 3-oxo-3-(2-methoxyphenyl)propanoate (7h)

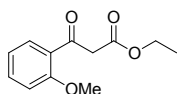

According to the general procedure to yield Ethyl 3-oxo-3-(2-methoxyphenyl)propanoate as yellow oil. <sup>1</sup>H-NMR (300MHz, CDCl<sub>3</sub>): δ 7.89-7.86 (m, 1H), 7.50-7.47 (m, 1H), 7.04-6.94 (m, 2H), 4.17 (q, *J* = 7.1 Hz, 2H), 3.96 (s, 2H), 3.89 (s, 3H), 1.22 (t, *J* = 7.1 Hz, 3H), 6.01 (s, 1 H, enol-CH=C), 12.70 (s, 1 H, enol-OH) ppm.

#### Ethyl 3-oxo-3-(3-methoxyphenyl)propanoate (7i)

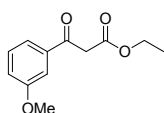

According to the general procedure to yield Ethyl 3-oxo-3-(3-methoxyphenyl)propanoate as yellow oil. <sup>1</sup>H-NMR (300MHz, CDCl<sub>3</sub>): δ 7.51-7.47 (m, 2H), 7.41-7.31 (m, 2H), 4.21 (q, *J* = 7.1 Hz, 2H), 3.97 (s, 2H), 3.85 (s, 3H), 1.26 (t, *J* = 7.1 Hz, 3H), 5.65 (s, 1 H, enol-CH=C), 12.57 (s, 1 H, enol-OH) ppm.

#### Ethyl 3-oxo-3-(4-methylphenyl)propanoate (7j)

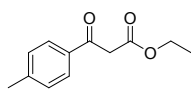

According to the general procedure to yield Ethyl 3-oxo-3-(4-methylphenyl)propanoate as yellow oil. <sup>1</sup>H-NMR (300MHz, CDCl<sub>3</sub>): δ 7.83 (d, *J* = 8.2 Hz, 2H), 7.26 (d, *J* = 8.0 Hz, 2H), 4.20 (q, *J* = 7.1 Hz, 2H), 3.95 (s, 2H), 2.40 (s, 3H), 1.24 (t, *J* = 7.1 Hz, 3H), 5.62 (s, 1 H, enol-CH=C), 12.58 (s, 1 H, enol-OH) ppm.

#### Ethyl 3-(naphthalen-2-yl)-3-oxopropanoate (7k)

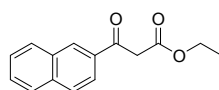

According to the general procedure to yield Ethyl 3-(naphthalen-2-yl)-3-oxopropanoate as yellow oil. <sup>1</sup>H-NMR (300MHz, CDCl<sub>3</sub>): δ 8.45 (s, 1H), 8.03-7.87 (m, 4H), 7.63-7.56 (m, 2H), 4.23 (q, *J* = 7.1 Hz, 2H), 4.12 (s, 2H), 1.26 (t, *J* = 7.1 Hz, 3H), 5.81 (s, 1 H, enol-CH=C), 12.68 (s, 1 H, enol-OH) ppm.

#### Ethyl 3-(furan-2-yl)-3-oxopropanoate (7l)



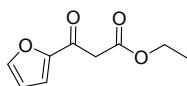

According to the general procedure to yield Ethyl 3-(furan-2-yl)-3-oxopropanoate as yellow oil.  $^1\text{H-NMR}$  (300MHz,  $\text{CDCl}_3$ ):  $\delta$  7.61 (s, 1H), 7.28 (s, 1H), 6.56 (s, 1H), 4.20 (q,  $J$  = 7.0 Hz, 3H), 3.84 (s, 2H), 1.25 (t,  $J$  = 7.0 Hz, 3H) ppm.

#### Ethyl 3-(thiophene-2-yl)-3-oxopropanoate (7m)

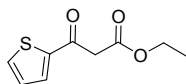

According to the general procedure to yield Ethyl 3-(thiophene-2-yl)-3-oxopropanoate as yellow oil.  $^1\text{H-NMR}$  (300MHz,  $\text{CDCl}_3$ ):  $\delta$  7.74-7.72 (m, 1H), 7.70-7.68 (m, 1H), 7.15-7.12 (m, 1H), 4.20 (q,  $J$  = 7.1 Hz, 3H), 3.91 (s, 2H), 1.25 (t,  $J$  = 7.1 Hz, 3H) ppm.

#### 2-carboethoxy-1-indanone (7n)

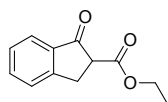

According to the general procedure to yield 2-carboethoxy-1-indanone as yellow oil.  $^1\text{H-NMR}$  (300MHz,  $\text{CDCl}_3$ ):  $\delta$  7.77 (d,  $J$  = 7.7 Hz, 1H), 7.65-7.59 (m, 1H), 7.50 (d,  $J$  = 7.7 Hz, 1H), 7.39 (t,  $J$  = 7.0 Hz, 1H), 4.24 (q,  $J$  = 7.1 Hz, 2H), 3.73-3.69 (m, 1H), 3.59-3.52 (m, 1H), 3.41-3.32 (m, 1H), 1.31 (t,  $J$  = 7.1 Hz, 3H) ppm.

#### Ethyl 1-oxo-1,2,3,4-tetrahydronaphthalene-2-carboxylate (7o)

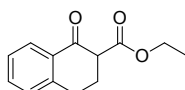

According to the general procedure to yield Ethyl 1-oxo-1,2,3,4-tetrahydronaphthalene-2-carboxylate as yellow oil.  $^1\text{H-NMR}$  (300MHz,  $\text{CDCl}_3$ ):  $\delta$  8.06 (dd,  $J$  = 7.5 Hz, 0.9 Hz, 1H), 7.50 (td,  $J$  = 7.5 Hz, 1.4 Hz, 1H), 7.28-7.26 (m, 1H), 7.18 (d,  $J$  = 6.8 Hz, 2H), 4.30-4.23 (m, 2H), 3.60 (dd,  $J$  = 10.4 Hz, 4.8 Hz, 1H), 3.06-2.99 (m, 2H), 2.51-2.47 (m, 1H), 2.47-2.35 (m, 1H), 1.29 (t,  $J$  = 7.1 Hz, 3H), 12.49 (s, 1 H, enol-OH) ppm.

## 10. Data of ligands and products.

#### (R)- Ethyl 3-hydroxy-3-phenylpropanoate (8) <sup>[3]</sup>

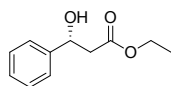

$[\alpha]_{\text{D}}^{20}$  +51.2 ( $c$  = 1.0,  $\text{CHCl}_3$ ).  $^1\text{H-NMR}$  (400MHz,  $\text{CDCl}_3$ ):  $\delta$  7.37-7.25 (m, 5H), 5.13-5.09 (m, 1H), 4.16 (q,  $J$  = 7.2Hz, 2H), 3.38 (d,  $J$  = 3.6Hz, 1H), 2.77-2.65 (m, 2H), 1.24 (t,  $J$  = 7.2Hz, 3H)ppm. HPLC conditions: Chiralcel OD column (25 cm  $\times$  0.46 cm ID); n-hexane/2-propanol = 85:15; flow rate = 1.0 mL/min; 254 nm UV detector;  $t_{\text{R}}$  (**S**) = 6.6 min.;  $t_{\text{R}}$  (**R**) = 7.9 min.

#### (R)- Ethyl 3- hydroxy-3-(4-nitrophenyl)propanoate (9b) <sup>[4]</sup>

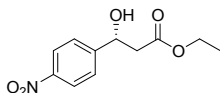

$[\alpha]_{\text{D}}^{20}$  +22.3 ( $c$  = 1.0,  $\text{CHCl}_3$ ).  $^1\text{H-NMR}$  (300MHz,  $\text{CDCl}_3$ ):  $\delta$  8.19 (d,  $J$  = 8.8Hz, 2H), 7.55 (d,  $J$  = 8.5Hz, 2H), 5.25-5.19 (m, 1H), 4.18 (q,  $J$  = 7.1Hz, 2H), 3.71 (d,  $J$  = 3.7Hz, 1H), 2.77-2.65 (m, 2H), 1.25 (t,  $J$  = 7.1Hz, 3H)ppm. HPLC conditions: Chiralcel AD column (25 cm  $\times$  0.46 cm ID); n-hexane/2-propanol = 90:10; flow rate = 1.0 mL/min; 220 nm UV detector;  $t_{\text{R}}$  = 18.16 min.;  $t_{\text{R}}$  = 19.25 min.

#### (R)- Ethyl 3- hydroxy-3-(4-chlorophenyl)propanoate (9c) <sup>[3]</sup>

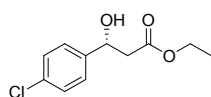

$[\alpha]_{\text{D}}^{20}$  +45.1( $c$  = 1.0,  $\text{CHCl}_3$ ).  $^1\text{H-NMR}$  (300MHz,  $\text{CDCl}_3$ ):  $\delta$  7.28 (s, 4H), 5.11-5.06 (m, 1H), 4.16 (q,  $J$  = 7.1Hz, 2H), 3.46 (d,  $J$  = 3.5Hz, 1H), 2.75-2.63 (m, 2H), 1.25 (t,  $J$  = 7.1Hz, 3H)ppm. HPLC conditions: Chiralcel AD column (25 cm  $\times$  0.46 cm ID); n-hexane/2-propanol = 90:10; flow rate = 1.0 mL/min; 220 nm UV detector;  $t_{\text{R}}$  = 10.17 min.;  $t_{\text{R}}$  = 10.77 min.

#### (R)- Ethyl 3- hydroxy-3-(2-chlorophenyl)propanoate (9d) <sup>[3]</sup>

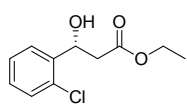

$[\alpha]_D^{20} +47.1$  (c = 1.0,  $\text{CHCl}_3$ ).  $^1\text{H-NMR}$  (300MHz,  $\text{CDCl}_3$ ):  $\delta$  7.65-7.62 (m, 1H), 7.35-7.29 (m, 2H), 7.26-7.20 (m, 1H), 5.52-5.46 (m, 1H), 4.21 (q,  $J$  = 7.1Hz, 2H), 3.54 (d,  $J$  = 3.5Hz, 1H), 2.90-2.54 (m, 2H), 1.28 (t,  $J$  = 7.2Hz, 3H)ppm. HPLC conditions: Chiralcel OD column (25 cm  $\times$  0.46 cm ID); n-hexane/2-propanol =

90:10; flow rate = 1.0 mL/min; 220 nm UV detector;  $t_R$  = 5.48 min.;  $t_R$  = 8.47 min.

**(R)- Ethyl 3- hydroxy-3-(3-chlorophenyl)propanoate (9e)**

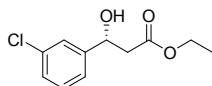

$^1\text{H-NMR}$  (300MHz,  $\text{CDCl}_3$ ):  $\delta$  7.38 (s, 1H), 7.28-7.22 (m, 3H), 5.09 (t,  $J$  = 6.6 Hz, 1H), 4.18 (q,  $J$  = 7.1Hz, 2H), 3.47 (d,  $J$  = 3.0 Hz, 1H), 2.70 (d,  $J$  = 5.9 Hz, 1H), 1.26 (t,  $J$  = 7.1 Hz, 3H)ppm. HPLC conditions: Chiralcel AD column (25 cm  $\times$  0.46 cm ID); n-hexane/2-propanol = 90:10; flow rate = 1.0

mL/min; 220 nm UV detector;  $t_R$  = 8.76 min.;  $t_R$  = 9.44 min.

**(R)-Ethyl 3- hydroxy-3-(4-bromophenyl)propanoate (9f) <sup>[3]</sup>**

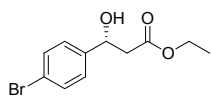

$[\alpha]_D^{20} +39.5$  (c = 1.0,  $\text{CHCl}_3$ ).  $^1\text{H-NMR}$  (300MHz,  $\text{CDCl}_3$ ):  $\delta$  7.47-7.44 (m, 2H), 7.26-7.22 (m, 2H), 5.09-5.04 (m, 1H), 4.16 (q,  $J$  = 7.1Hz, 2H), 3.49 (s, 1H), 2.74-2.62 (m, 2H), 1.25 (t,  $J$  = 7.2 Hz, 3H)ppm. HPLC conditions: Chiralcel AD column (25 cm  $\times$  0.46 cm ID); n-hexane/2-propanol = 90:10; flow rate = 1.0

mL/min; 220 nm UV detector;  $t_R$  = 10.31 min.;  $t_R$  = 11.19 min.

**(R)- Ethyl 3-hydroxy-3-(4-methoxyphenyl)propanoate (9g) <sup>[3]</sup>**

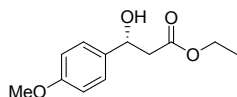

$[\alpha]_D^{20} +40.5$  (c = 1.0,  $\text{CHCl}_3$ ).  $^1\text{H-NMR}$  (300MHz,  $\text{CDCl}_3$ ):  $\delta$  7.30-7.26 (m, 2H), 6.90-6.85 (m, 2H), 5.10-5.04 (m, 1H), 4.16 (q,  $J$  = 7.2Hz, 2H), 3.79 (s, 3H), 3.24 (d,  $J$  = 3.2Hz, 1H), 2.79-2.62 (m, 2H), 1.25 (t,  $J$  = 7.1Hz, 3H)ppm. HPLC conditions: Chiralcel AS column (25 cm  $\times$  0.46 cm ID); n-

hexane/2-propanol = 70:30; flow rate = 1.0 mL/min; 220 nm UV detector;  $t_R$  = 5.39 min.;  $t_R$  = 6.30 min.

**(R)- Ethyl 3-hydroxy-3-(2-methoxyphenyl)propanoate (9h) <sup>[3]</sup>**

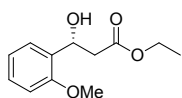

$[\alpha]_D^{20} +44.5$  (c = 1.0,  $\text{CHCl}_3$ ).  $^1\text{H-NMR}$  (300MHz,  $\text{CDCl}_3$ ):  $\delta$  7.44-7.41 (m, 2H), 7.28-7.23 (m, 2H), 5.38-5.34 (m, 1H), 4.17 (q,  $J$  = 7.1Hz, 2H), 3.84 (s, 3H), 3.47 (brs, 1H), 2.86-2.65 (m, 2H), 1.26 (t,  $J$  = 7.1Hz, 3H)ppm.

HPLC conditions: Chiralcel OD column (25 cm  $\times$  0.46 cm ID); n-hexane/2-propanol = 90:10; flow rate = 1.0

mL/min; 220 nm UV detector;  $t_R$  = 7.54 min.;  $t_R$  = 7.89 min.

**(R)- Ethyl 3-hydroxy-3-(2-methoxyphenyl)propanoate (9i) <sup>[3]</sup>**

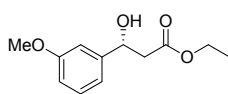

$[\alpha]_D^{20} +39.6$  (c = 1.0,  $\text{CHCl}_3$ ).  $^1\text{H-NMR}$  (300MHz,  $\text{CDCl}_3$ ):  $\delta$  7.26 (t,  $J$  = 8.5Hz, 1H), 6.95-6.92 (m, 2H), 6.84-6.80 (m, 1H), 5.13-5.08 (m, 1H), 4.18 (q,  $J$  = 7.1Hz, 2H), 3.81 (s, 3H), 3.31 (brs, 1H), 2.79-2.67 (m, 2H), 1.26 (t,  $J$  = 7.1Hz, 3H)ppm. HPLC conditions: Chiralcel AD column (25 cm  $\times$  0.46 cm ID); n-

hexane/2-propanol = 90:10; flow rate = 1.0 mL/min; 220 nm UV detector;  $t_R$  = 13.69 min.;  $t_R$  = 14.56 min.

**(R)- Ethyl 3-hydroxy-3-(4- methylphenyl)propanoate (9j) <sup>[3]</sup>**

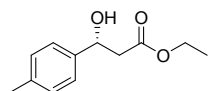

$[\alpha]_D^{20} +50.6$  (c = 1.0,  $\text{CHCl}_3$ ).  $^1\text{H-NMR}$  (300MHz,  $\text{CDCl}_3$ ):  $\delta$  7.26 (d,  $J$  = 8.0Hz, 2H), 7.16 (d,  $J$  = 8.4Hz, 2H), 5.12-5.08 (m, 1H), 4.18 (q,  $J$  = 7.1Hz, 2H), 3.25 (s, 1H), 2.80-2.64 (m, 2H), 2.34 (s, 3H), 1.26 (t,  $J$  = 7.2Hz, 3H)ppm. HPLC conditions: Chiralcel AS column (25 cm  $\times$  0.46 cm ID); n-hexane/2-propanol =

95:5; flow rate = 1.0 mL/min; 220 nm UV detector;  $t_R$  = 10.05 min.;  $t_R$  = 10.88 min.

**(R)- Ethyl 3-hydroxy-3-(2-naphthyl)propanoate (9k) <sup>[5]</sup>**

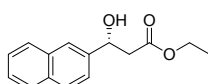

$[\alpha]_D^{20} +30.7$  (c = 1.0,  $\text{CHCl}_3$ ).  $^1\text{H-NMR}$  (300MHz,  $\text{CDCl}_3$ ):  $\delta$  7.85-7.82 (m, 4H), 7.51-7.45 (m, 3H), 5.33-5.28 (m, 1H), 4.19 (q,  $J$  = 7.1Hz, 2H), 3.48 (brs, 1H), 2.90-2.75 (m, 2H), 1.26 (t,  $J$  = 7.1Hz, 3H)ppm.

HPLC conditions: Chiralcel AS column (25 cm × 0.46 cm ID); n-hexane/2-propanol = 95:5; flow rate = 1.0 mL/min; 220 nm UV detector;  $t_R$  = 14.96 min.;  $t_R$  = 16.43 min.

**(R)- Ethyl 3-(2-furyl)-3-hydroxypropanoate (9l)** <sup>[4]</sup>

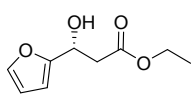

$[\alpha]_D^{20}$  +19.6 (c = 1.0, CHCl<sub>3</sub>). <sup>1</sup>H-NMR (300MHz, CDCl<sub>3</sub>):  $\delta$  7.36 (brs, 1H), 6.33-5.31 (m, 1H), 6.27 (d,  $J$  = 3.2Hz, 1H), 5.15-5.10 (m, 1H), 4.18 (q,  $J$  = 7.1Hz, 2H), 3.30 (s, 1H), 2.94-2.78 (m, 2H), 1.26 (t,  $J$  = 7.1Hz, 3H)ppm. HPLC conditions: Chiralcel OD column (25 cm × 0.46 cm ID); n-hexane/2-propanol = 90:10; flow

rate = 1.0 mL/min; 220 nm UV detector;  $t_R$  (**S**) = 6.76 min.;  $t_R$  (**R**) = 16.37 min.

**(R)- Ethyl 3-hydroxy-3-(2-thienyl)propanoate (9m)** <sup>[5]</sup>

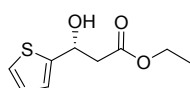

$[\alpha]_D^{20}$  +22.3 (c = 1.0, CHCl<sub>3</sub>). <sup>1</sup>H-NMR (300MHz, CDCl<sub>3</sub>):  $\delta$  7.26-7.23 (m, 1H), 6.97-6.94 (m, 2H), 5.38-5.34 (m, 1H), 4.18 (q,  $J$  = 7.1Hz, 2H), 3.55 (s, 1H), 2.92-2.78 (m, 2H), 1.26 (t,  $J$  = 7.1Hz, 3H)ppm. HPLC conditions: Chiralcel OD column (25 cm × 0.46 cm ID); n-hexane/2-propanol = 90:10; flow rate = 1.0

mL/min; 220 nm UV detector;  $t_R$  = 6.76 min.;  $t_R$  = 12.42 min.

**(1R,2R)- Ethyl1-hydroxyindane-2-carboxylate (9n)** <sup>[6]</sup>

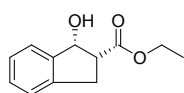

$[\alpha]_D^{20}$  -50.3 (c = 1.0, CHCl<sub>3</sub>). <sup>1</sup>H-NMR (300MHz, CDCl<sub>3</sub>):  $\delta$  7.41 (brs, 1H), 7.27 (brs, 3H), 5.32 (d,  $J$  = 5.4Hz, 1H), 4.23 (q,  $J$  = 7.1Hz, 2H), 3.48-3.33 (m, 2H), 3.12-3.02 (m, 2H), 1.31 (t,  $J$  = 7.1Hz, 3H)ppm. HPLC conditions: Chiralcel AS column (25 cm × 0.46 cm ID); n-hexane/2-propanol = 70:30; flow rate = 1.0

mL/min; 220 nm UV detector;  $t_R$  = 5.26 min.;  $t_R$  = 6.80 min.

**(1R,2R)- Ethyl1-hydroxytetraline-2-carboxylate (9o)** <sup>[6]</sup>

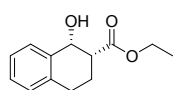

$[\alpha]_D^{20}$  +116.3 (c = 1.0, CHCl<sub>3</sub>). <sup>1</sup>H-NMR (300MHz, CDCl<sub>3</sub>):  $\delta$  7.42-7.38 (m, 1H), 7.26-7.21 (m, 2H), 7.14-7.11 (m, 1H), 5.03 (s, 1H), 4.24 (q,  $J$  = 8.5Hz, 2H), 3.12 (d,  $J$  = 5.0Hz, 1H), 2.91-2.75 (m, 3H), 2.22-2.11 (m, 2H), 1.31 (t,  $J$  = 7.1Hz, 3H)ppm. HPLC conditions: Chiralcel OD column (25 cm × 0.46 cm ID); n-hexane/2-

propanol = 90:10; flow rate = 1.0 mL/min; 220 nm UV detector;  $t_R$  = 6.04 min.;  $t_R$  = 8.77 min.

# Ligand L4

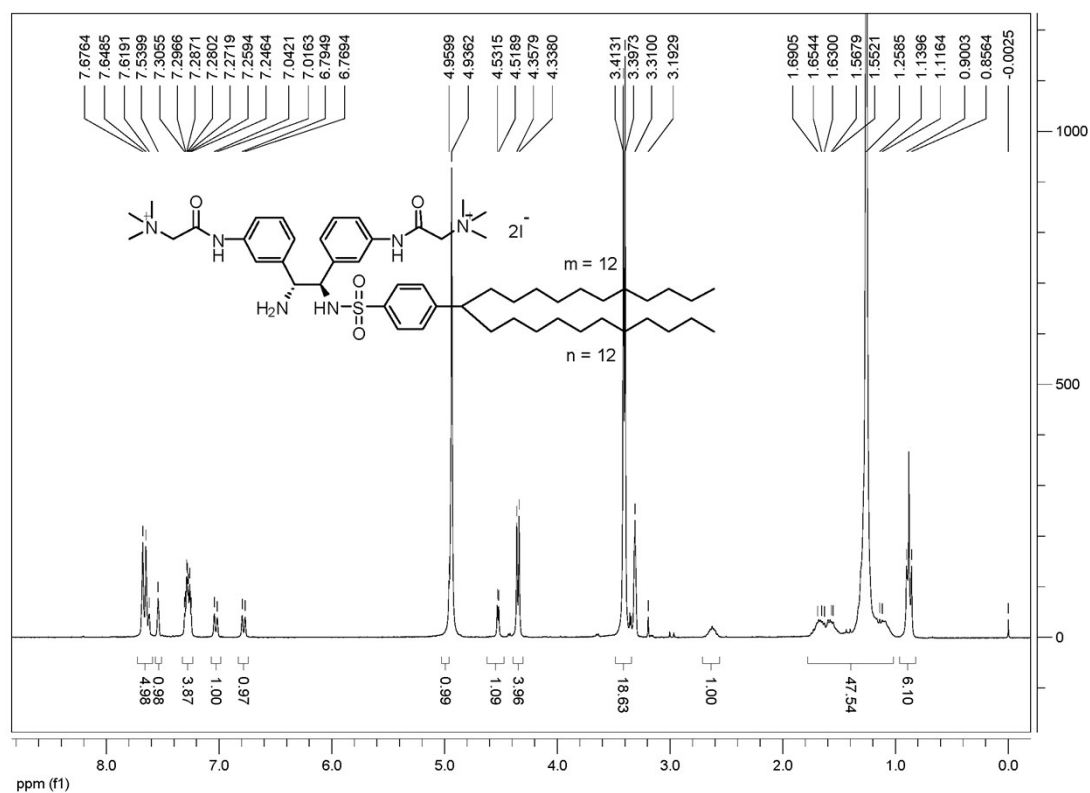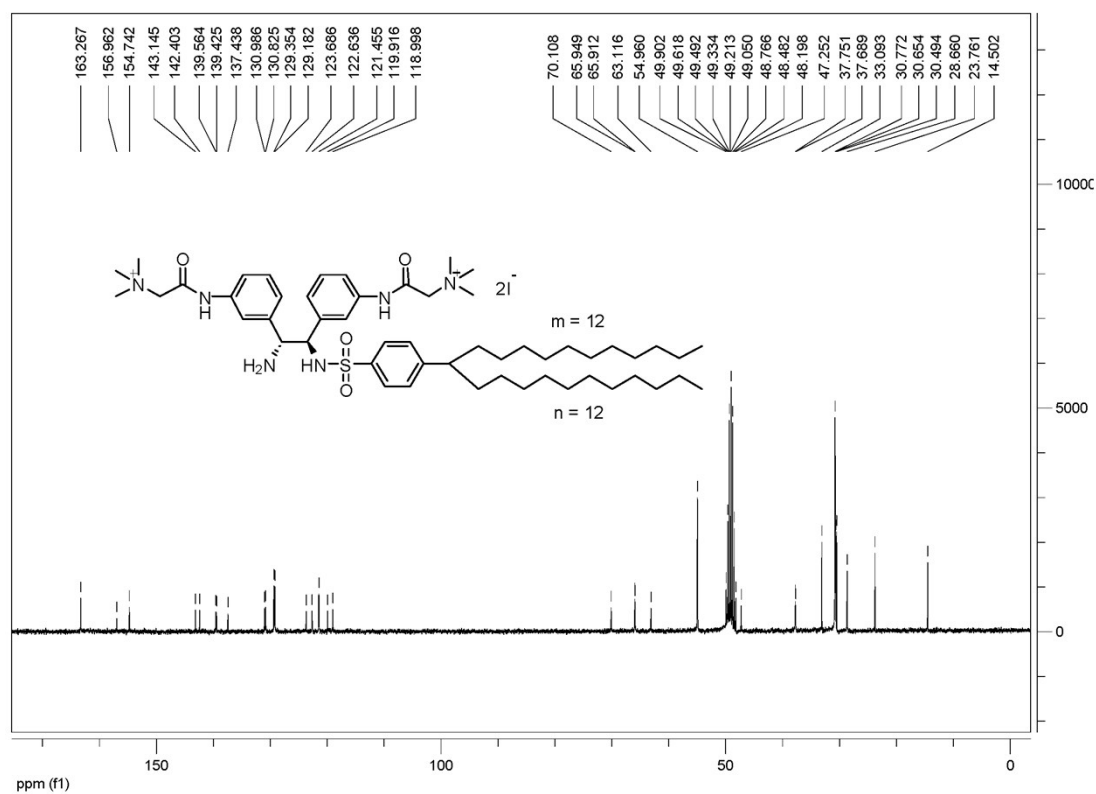

# Ligand L2

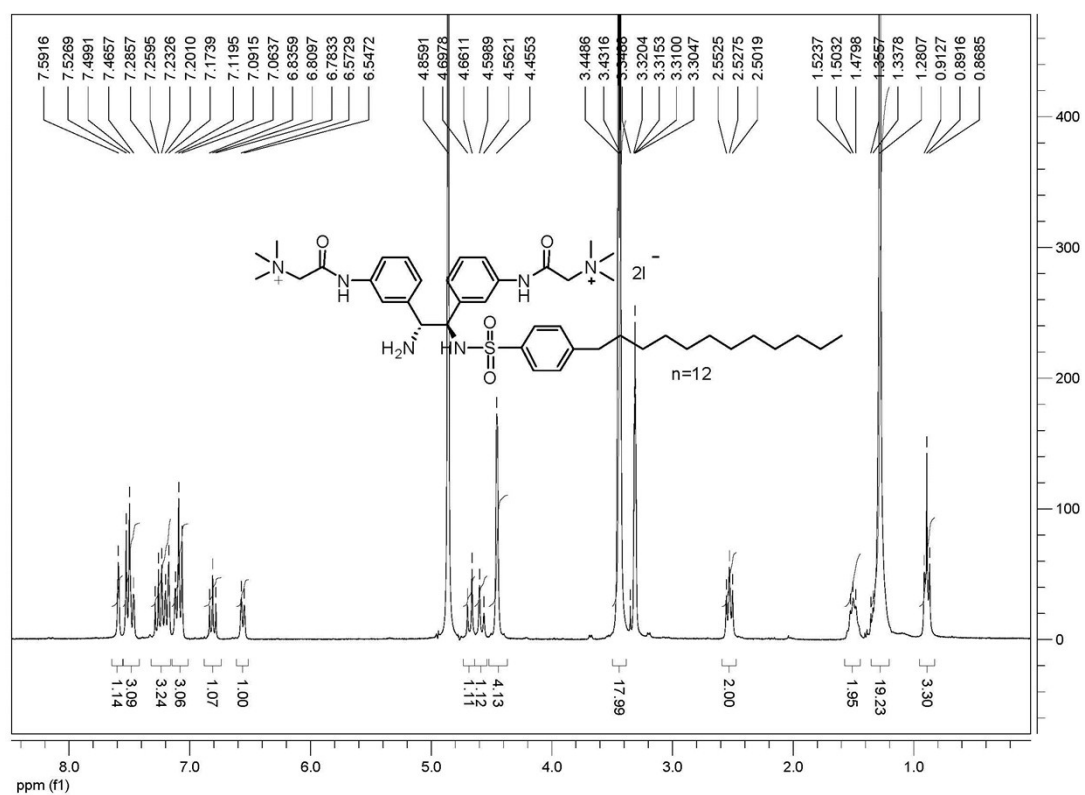

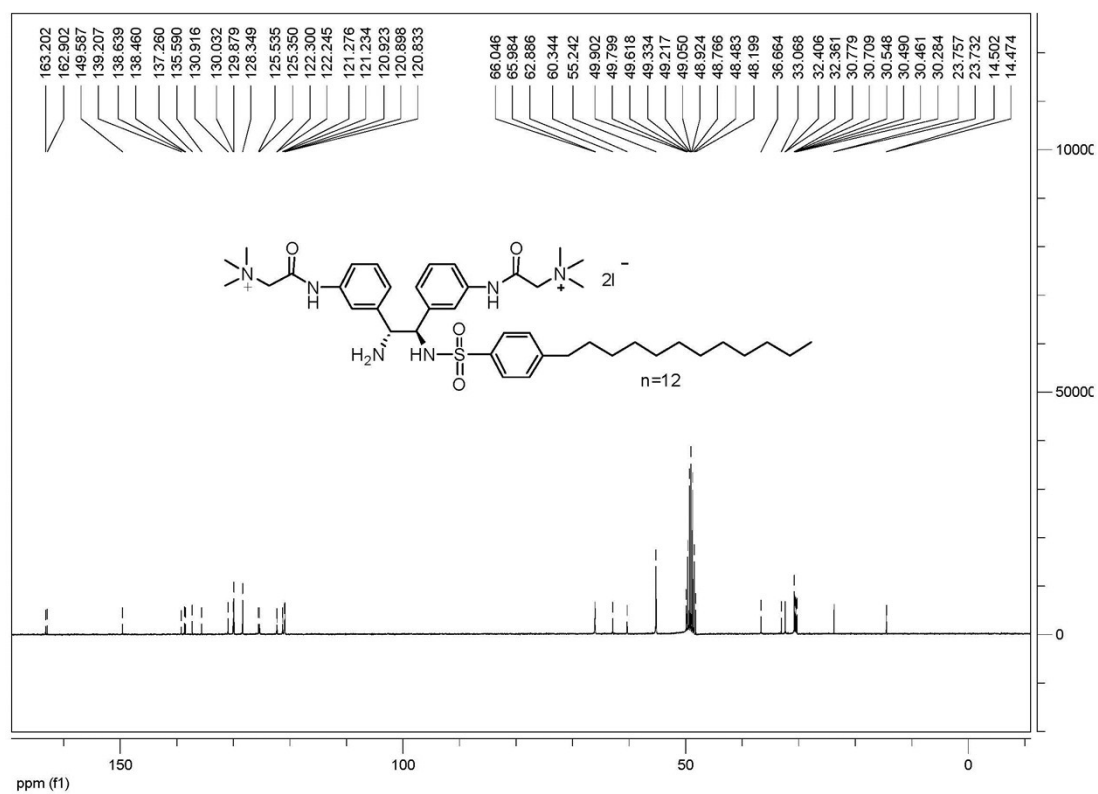

Ligand L3

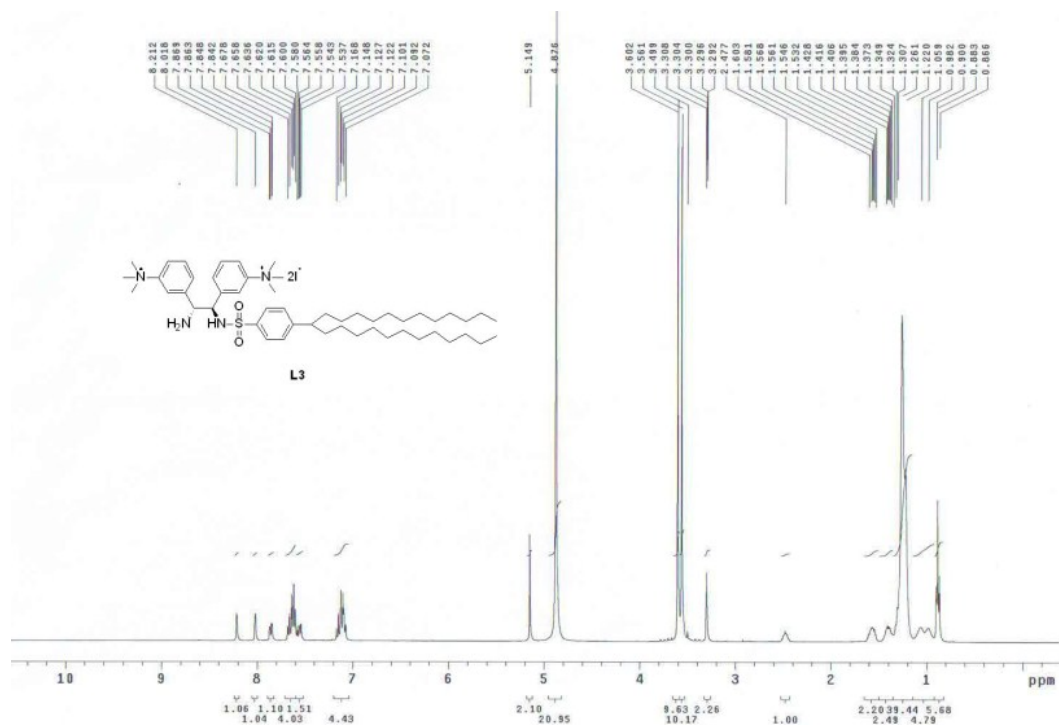

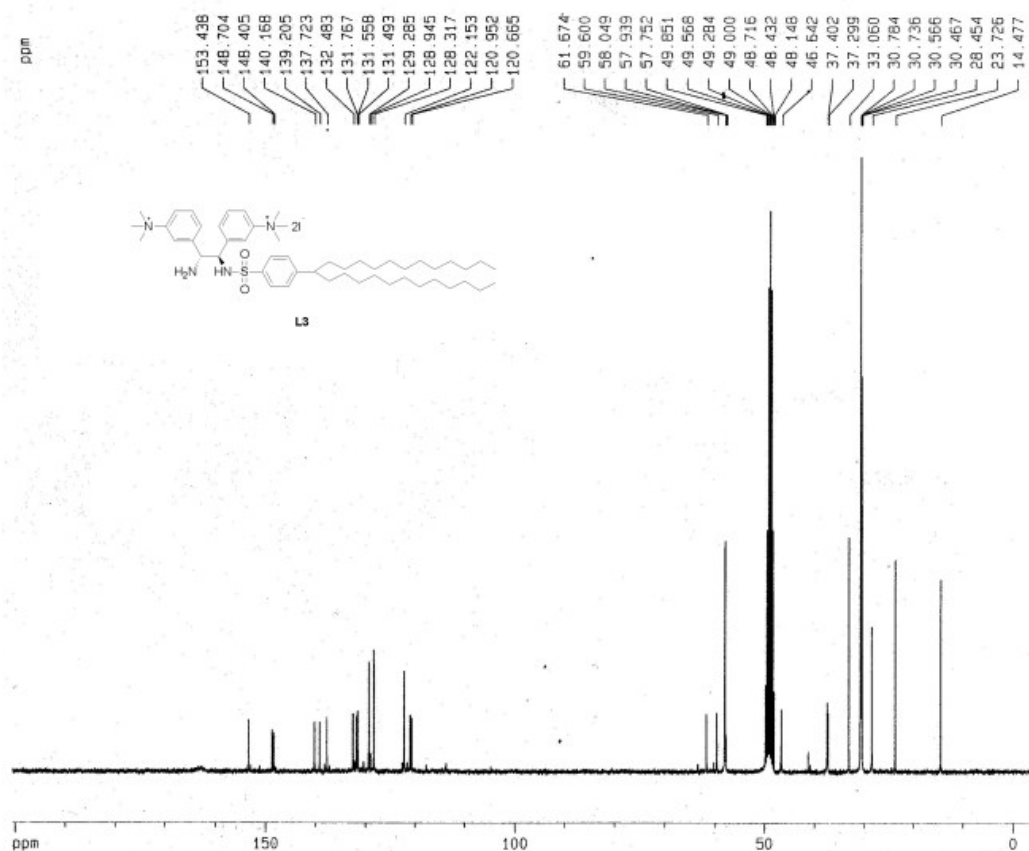

### Ethyl 1-hydroxyindane-2-carboxylate (9n)

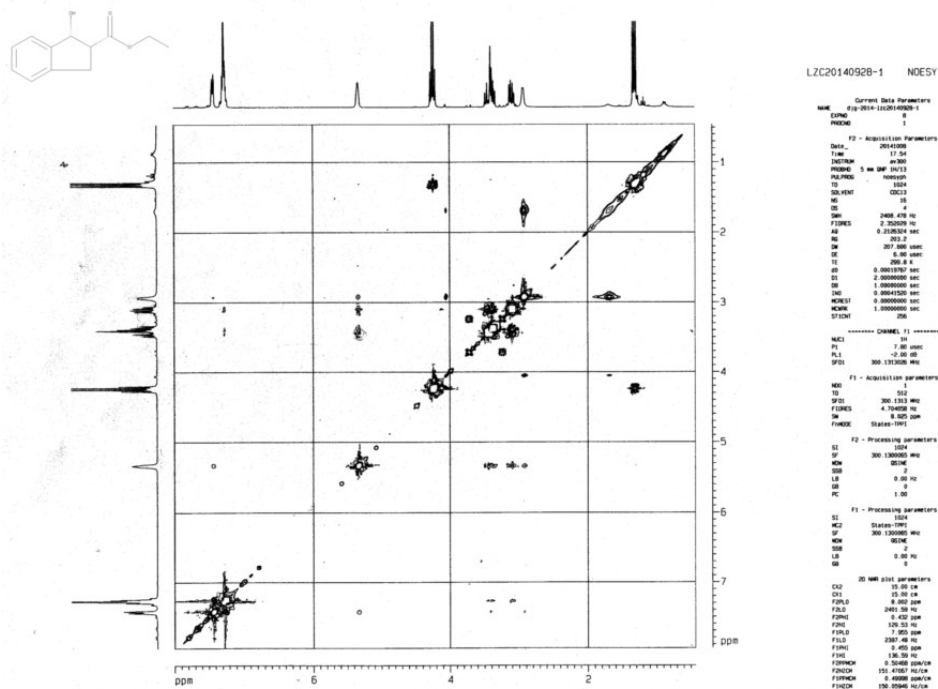

# Ethyl 1-hydroxytetraline-2-carboxylate (9o)

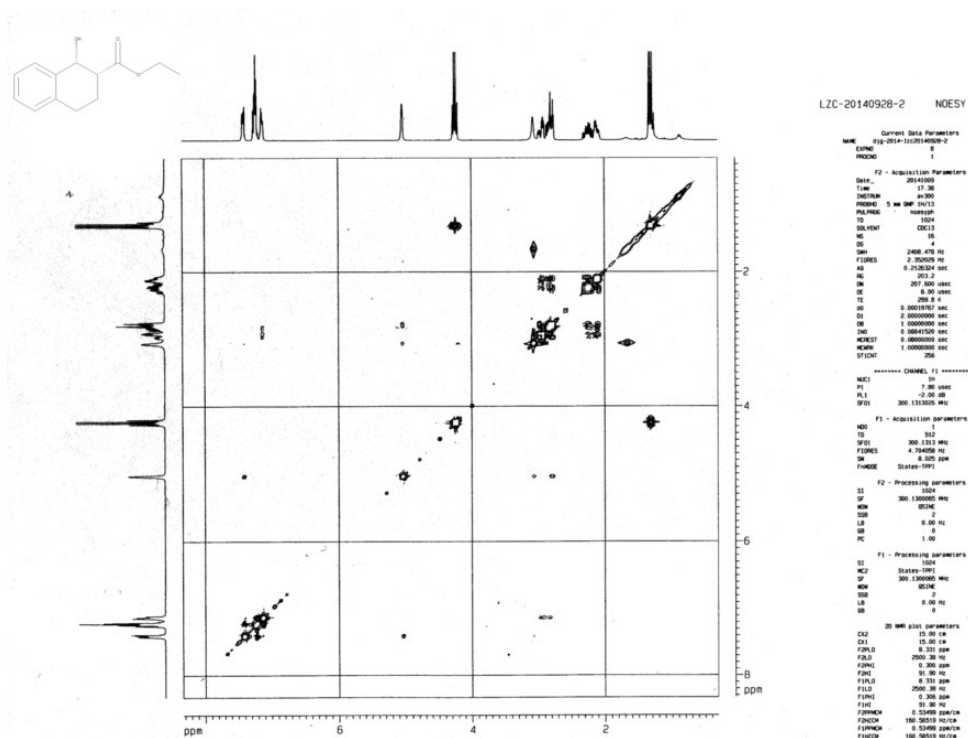

# (R)- Ethyl 3-hydroxy-3-phenylpropanoate (8)

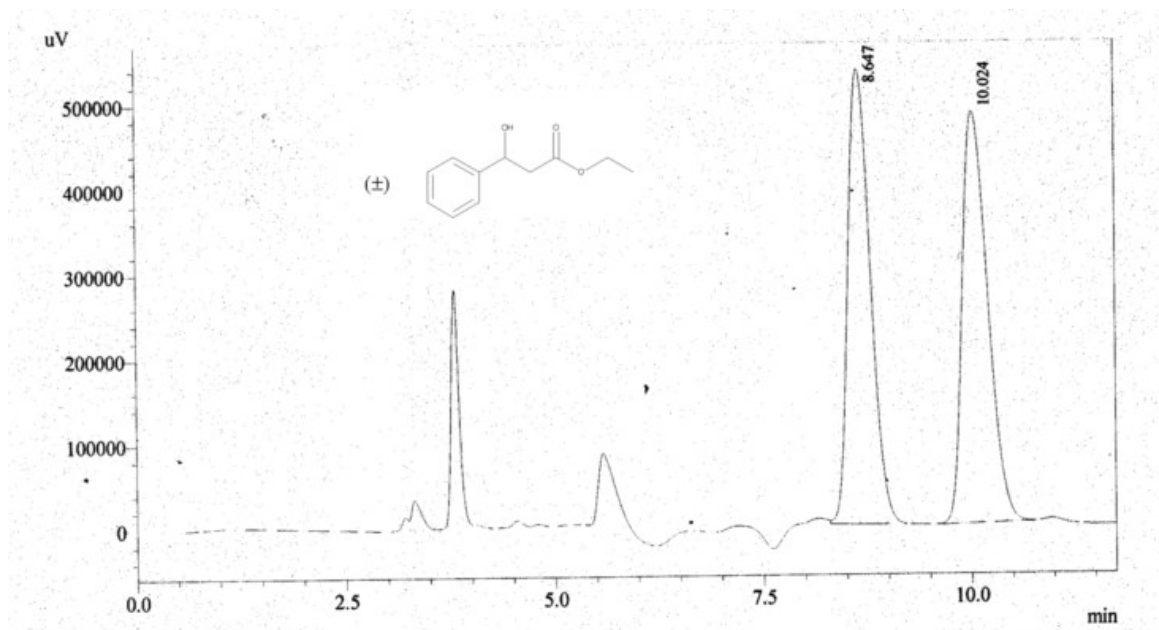



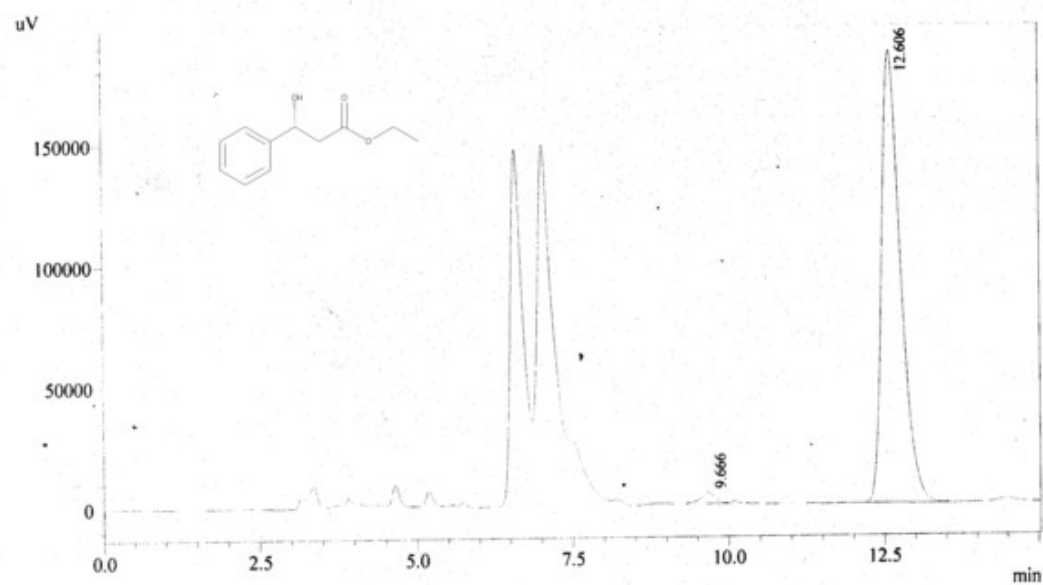

1 Det.A Ch1 / 220nm

Detector A Ch1 220nm

| Peak# | Ret. Time | Area    | Height | Area %  | Height % |
|-------|-----------|---------|--------|---------|----------|
| 1     | 9.666     | 71031   | 4543   | 1.760   | 2.377    |
| 2     | 12.606    | 3963873 | 186616 | 98.240  | 97.623   |
| Total |           | 4034904 | 191159 | 100.000 | 100.000  |

(R)- Ethyl 3- hydroxy-3-(4-nitrophenyl)propanoate (9b)

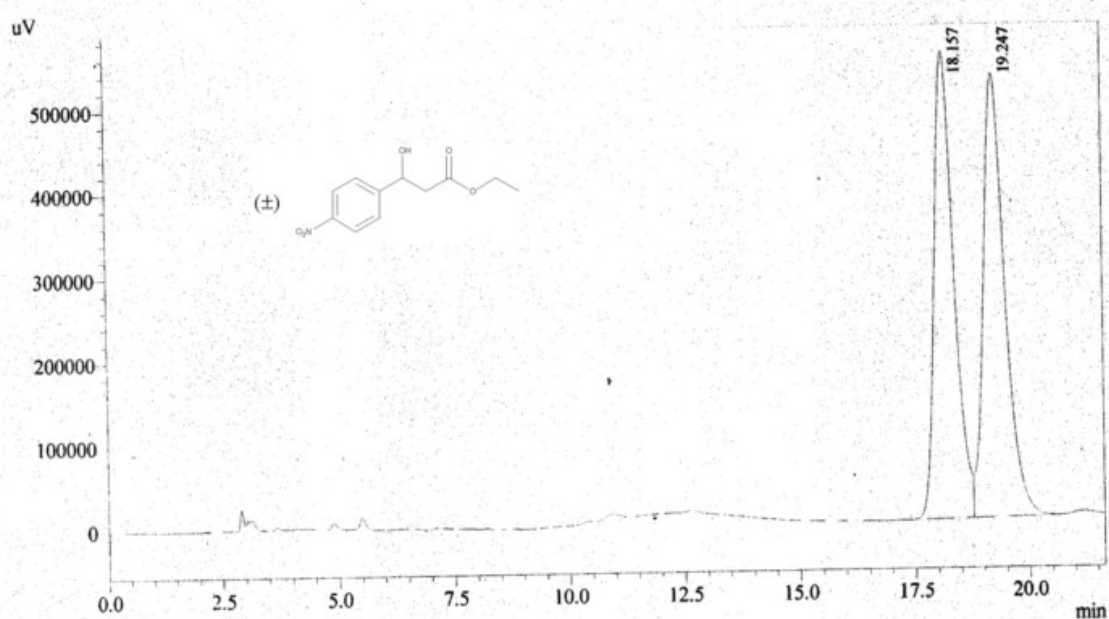

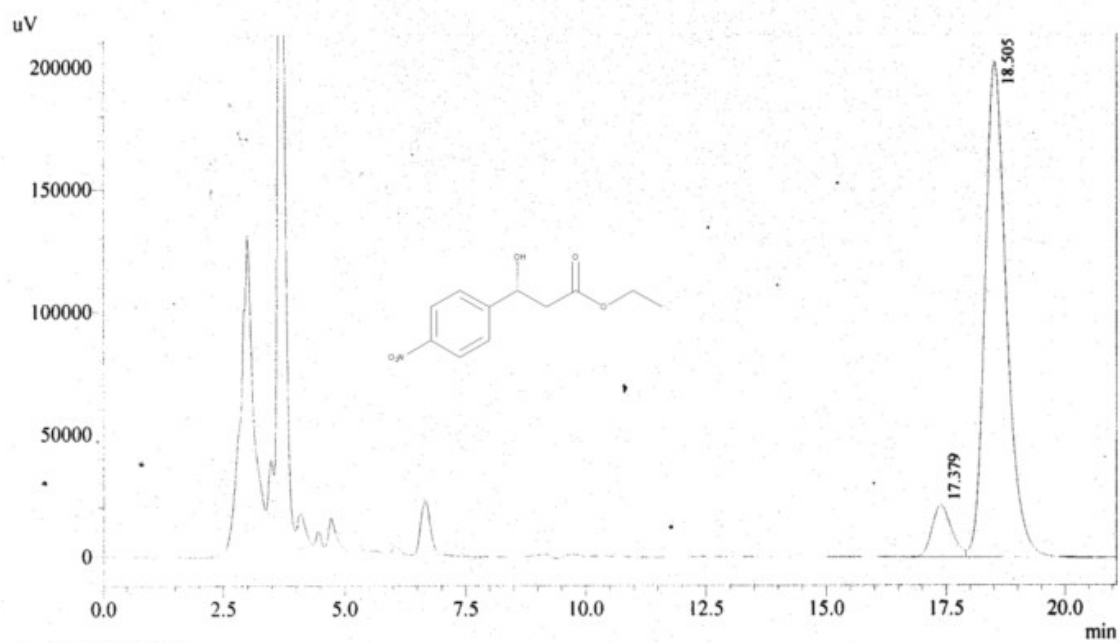

1 Det.A Ch1 / 220nm

| Peak# | Ret. Time | Area    | Height | Area %  | Height % |
|-------|-----------|---------|--------|---------|----------|
| 1     | 17.379    | 603082  | 21224  | 8.616   | 9.494    |
| 2     | 18.505    | 6396714 | 202329 | 91.384  | 90.506   |
| Total |           | 6999796 | 223553 | 100.000 | 100.000  |

(R)- Ethyl 3- hydroxy-3-(4-chlorophenyl)propanoate (9c)

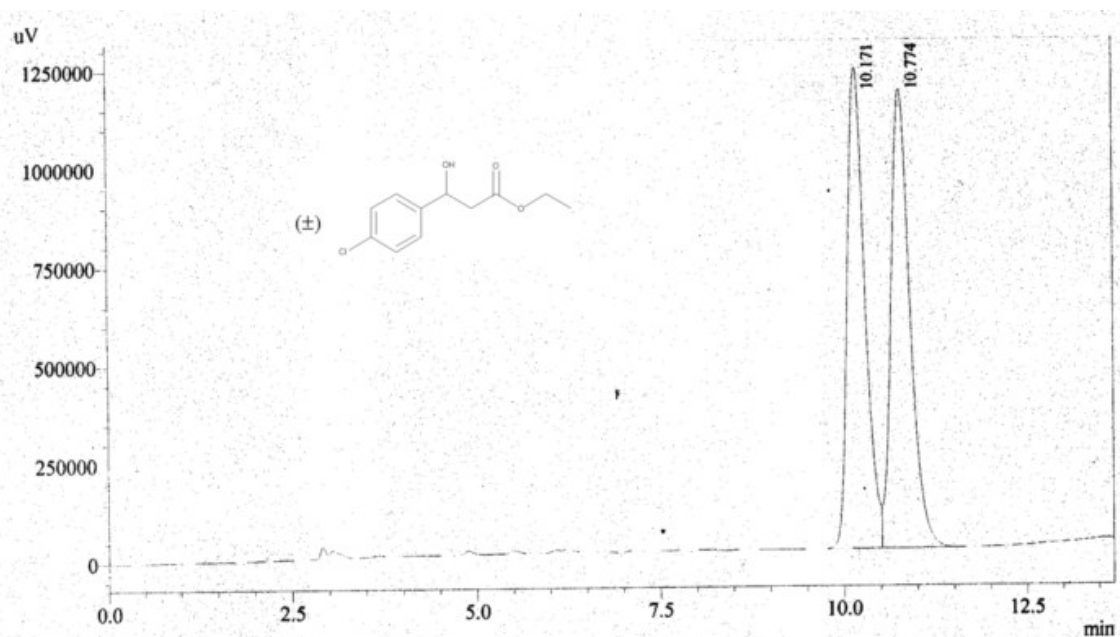

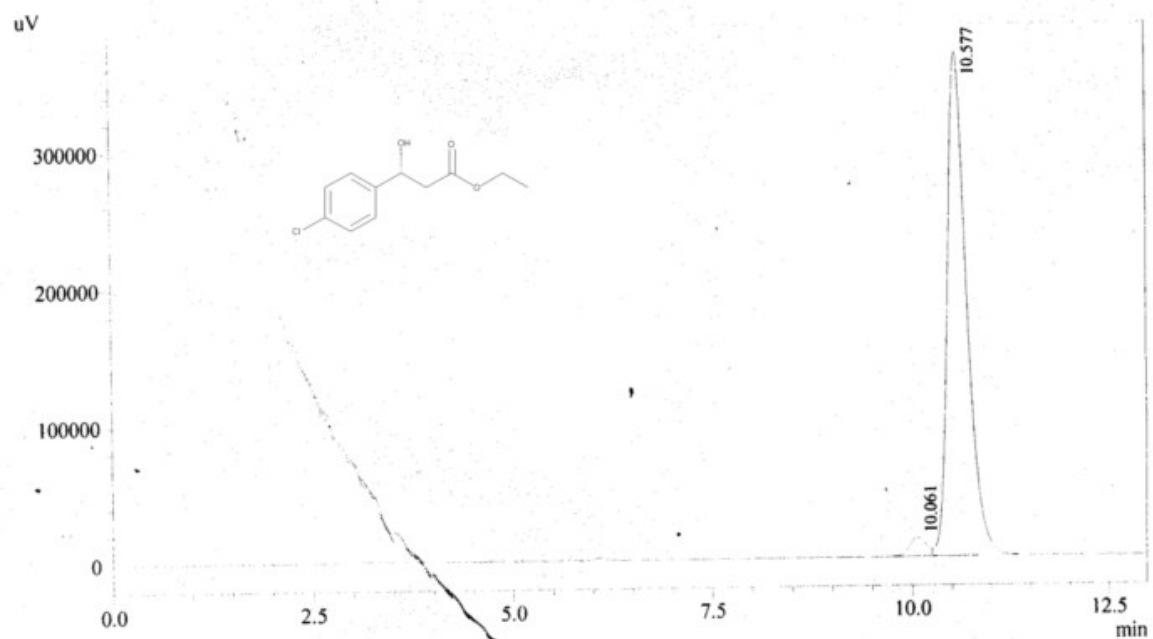

I Det.A Ch1 / 220nm

| Peak# | Ret. Time | Area    | Height | Area %  | Height % |
|-------|-----------|---------|--------|---------|----------|
| 1     | 10.061    | 201637  | 13814  | 3.161   | 3.625    |
| 2     | 10.577    | 6177463 | 367273 | 96.839  | 96.375   |
| Total |           | 6379100 | 381087 | 100.000 | 100.000  |

(R)- Ethyl 3- hydroxy-3-(2-chlorophenyl)propanoate (9d)

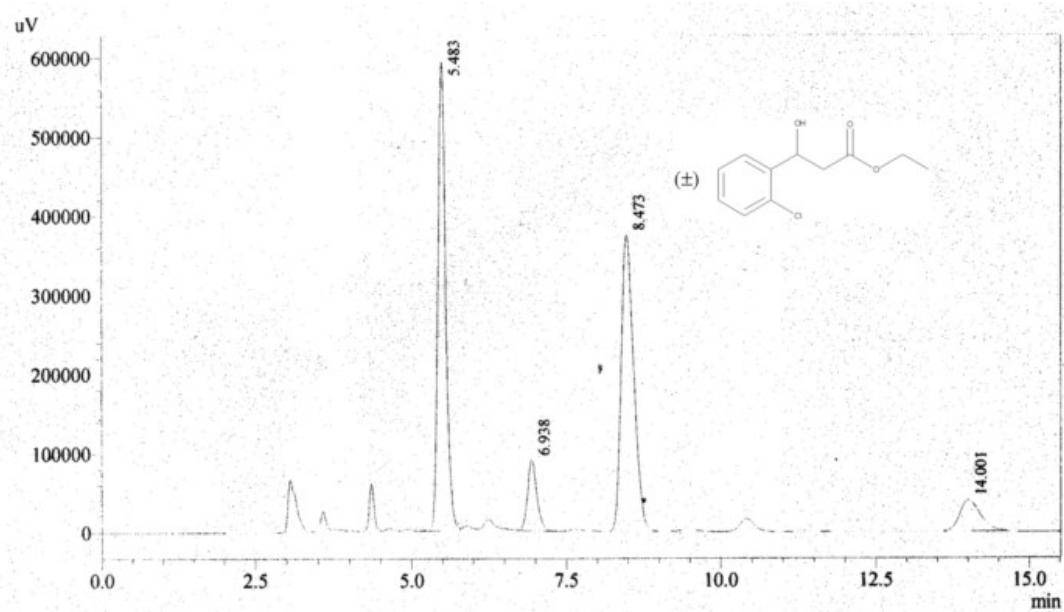

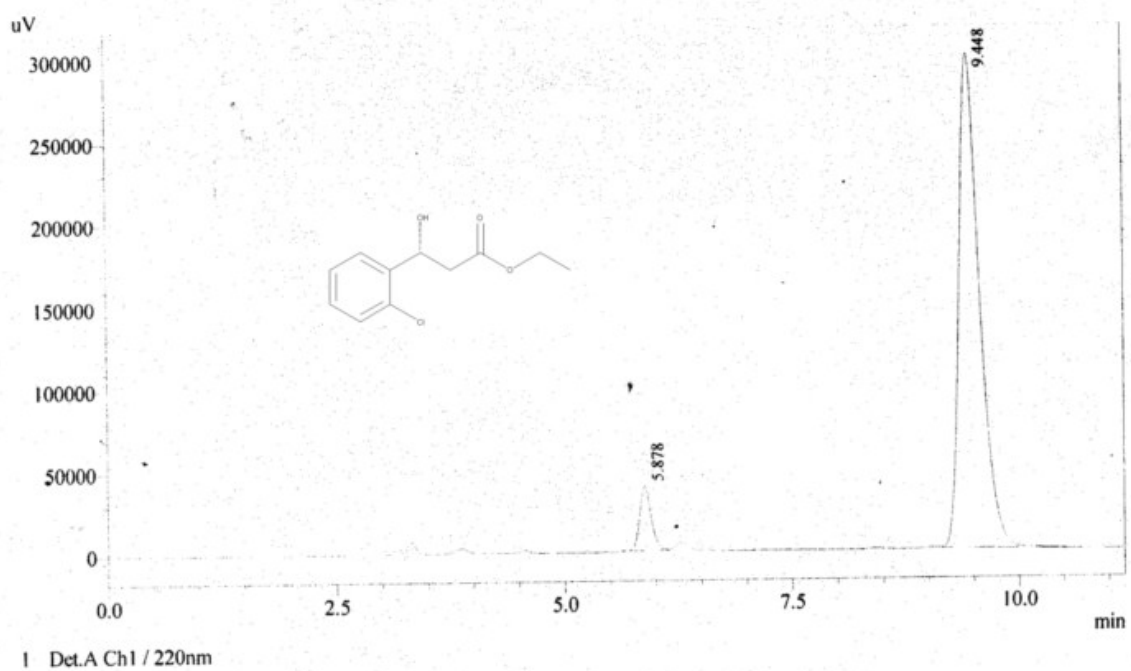

1 Det.A Ch1 / 220nm

| Peak# | Ret. Time | Area    | Height | Area %  | Height % |
|-------|-----------|---------|--------|---------|----------|
| 1     | 5.878     | 337821  | 39271  | 6.677   | 11.583   |
| 2     | 9.448     | 4721775 | 299761 | 93.323  | 88.417   |
| Total |           | 5059596 | 339032 | 100.000 | 100.000  |

(R)- Ethyl 3- hydroxy-3-(3-chlorophenyl)propanoate (9e)

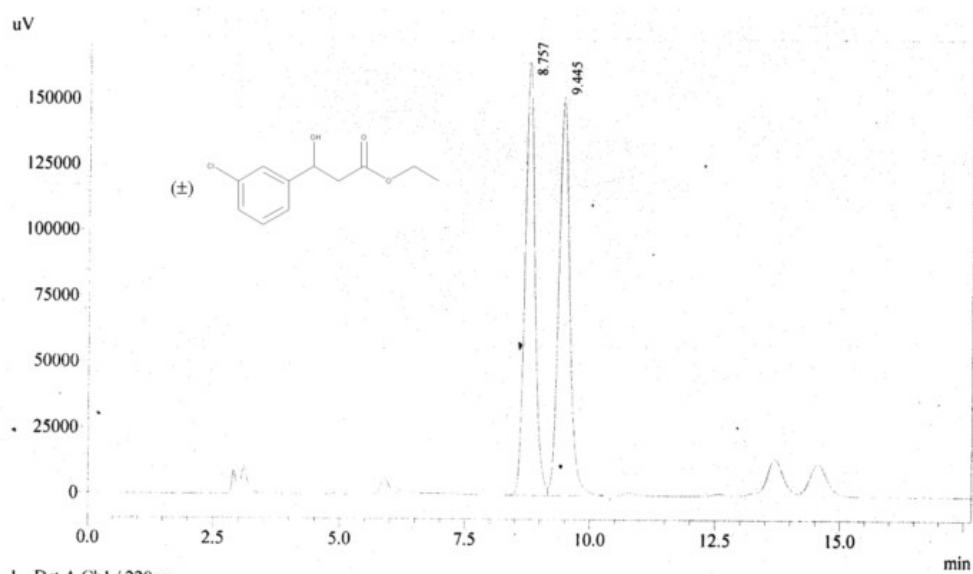

1 Det.A Ch1 / 220nm

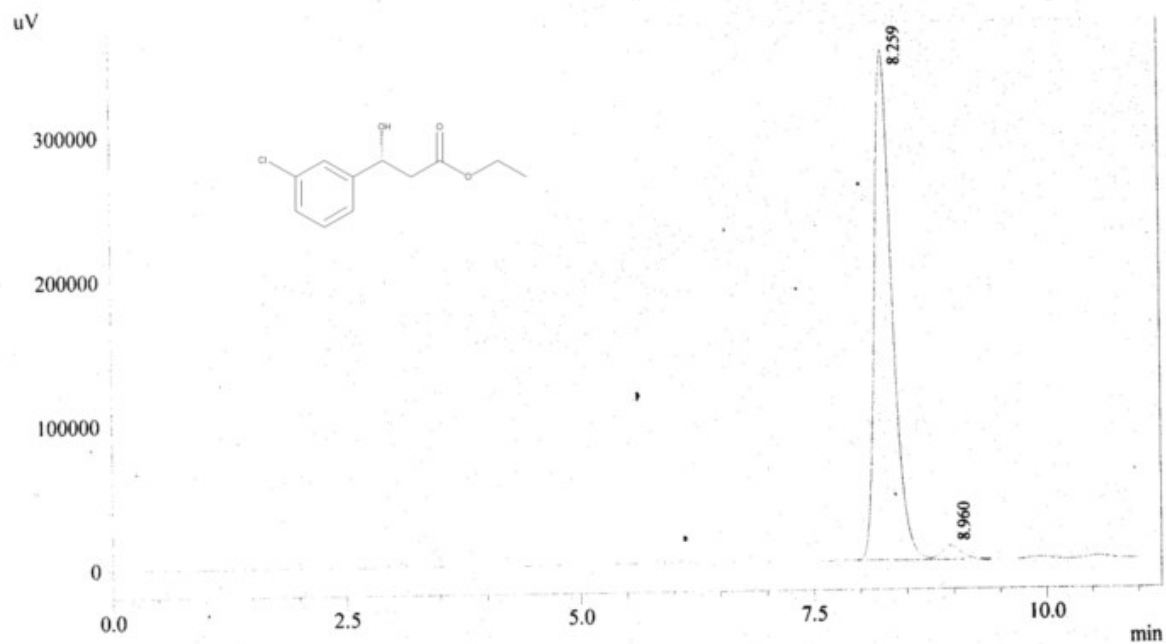

I Det.A Ch1 / 220nm

| Peak# | Ret. Time | Area    | Height | Area %  | Height % |
|-------|-----------|---------|--------|---------|----------|
| 1     | 8.259     | 4591585 | 353312 | 96.998  | 97.296   |
| 2     | 8.960     | 142097  | 9820   | 3.002   | 2.704    |
| Total |           | 4733682 | 363132 | 100.000 | 100.000  |

(R)- Ethyl 3- hydroxy-3-(4-bromophenyl)propanoate (9f)

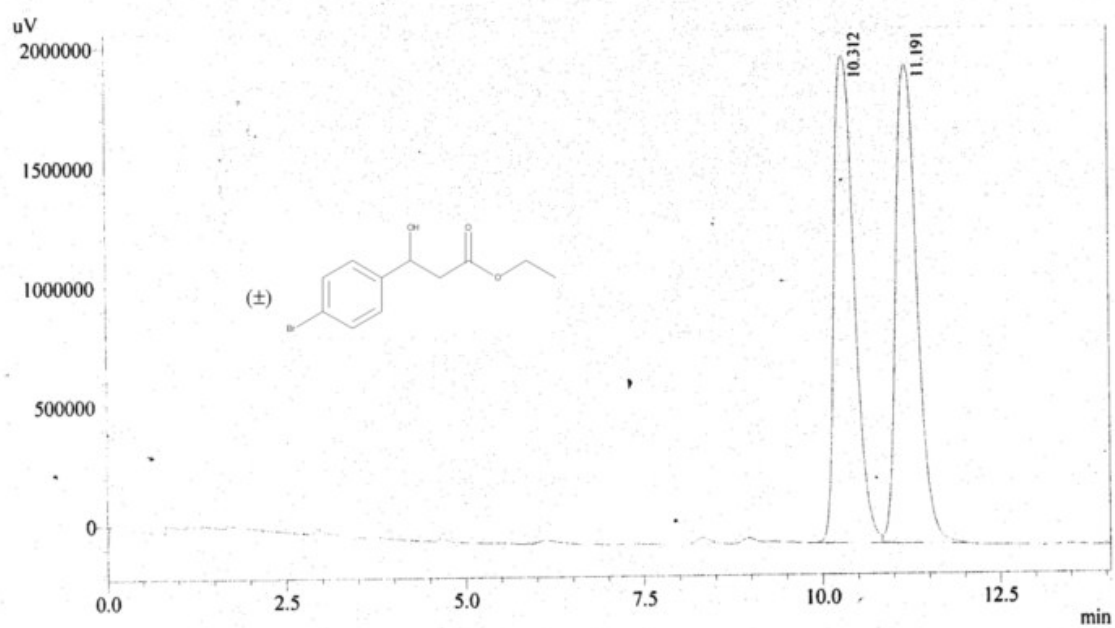

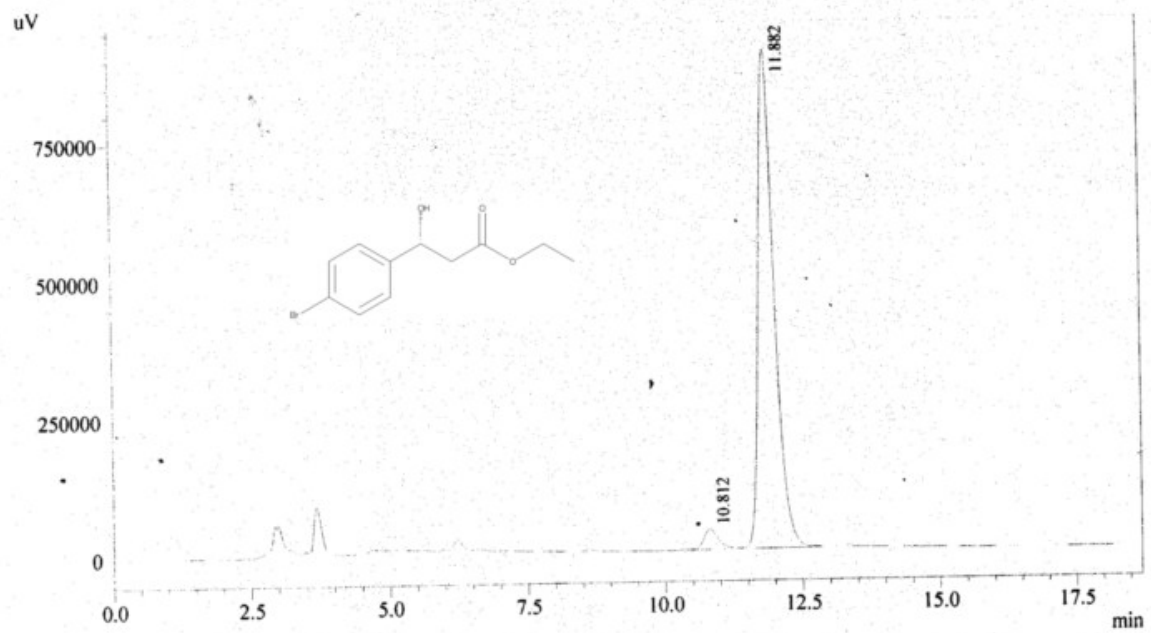

I Det.A Ch1 / 220nm

| Peak# | Ret. Time | Area     | Height | Area %  | Height % |
|-------|-----------|----------|--------|---------|----------|
| 1     | 10.812    | 670119   | 36196  | 3.575   | 3.857    |
| 2     | 11.882    | 18072746 | 902181 | 96.425  | 96.143   |
| Total |           | 18742865 | 938377 | 100.000 | 100.000  |

(R)- Ethyl 3-hydroxy-3-(4-methoxyphenyl)propanoate (9g)

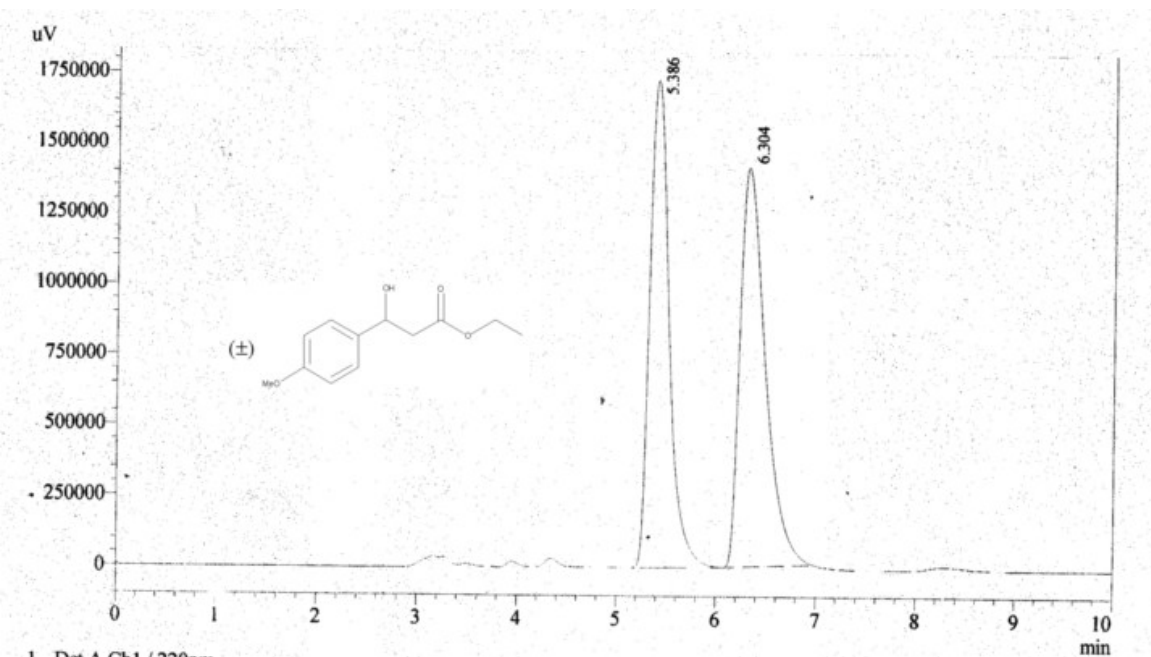

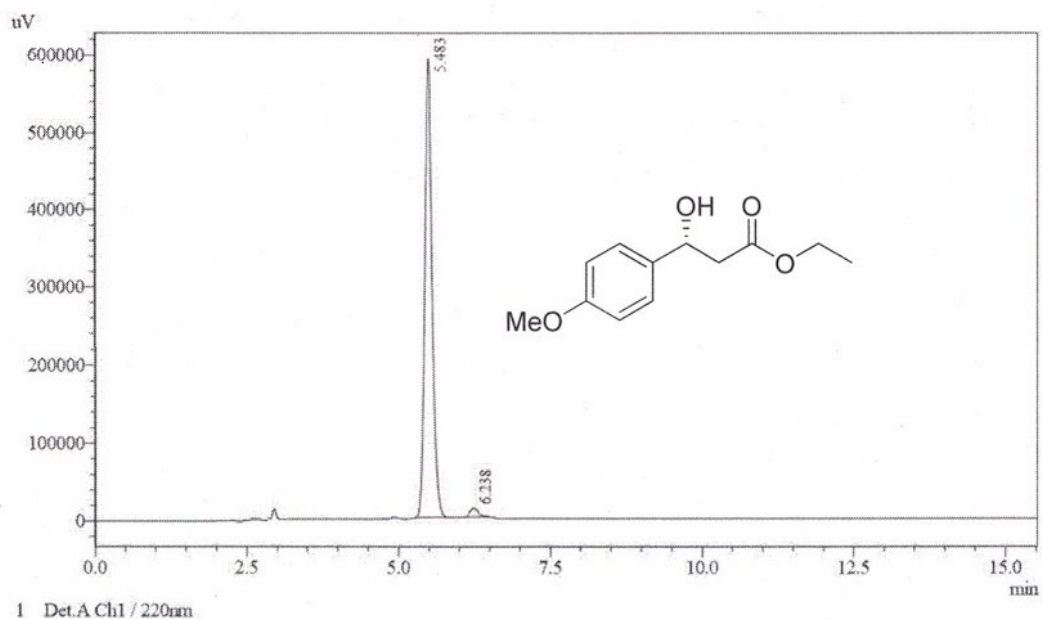

Detector A Ch1 220nm

| Peak# | Ret. Time | Area    | Height | Area %  | Height % |
|-------|-----------|---------|--------|---------|----------|
| 1     | 5.483     | 5108602 | 589888 | 98.534  | 98.390   |
| 2     | 6.238     | 75993   | 9655   | 1.466   | 1.610    |
| Total |           | 5184595 | 599542 | 100.000 | 100.000  |

(R)- Ethyl 3-hydroxy-3-(2-methoxyphenyl)propanoate (9h)

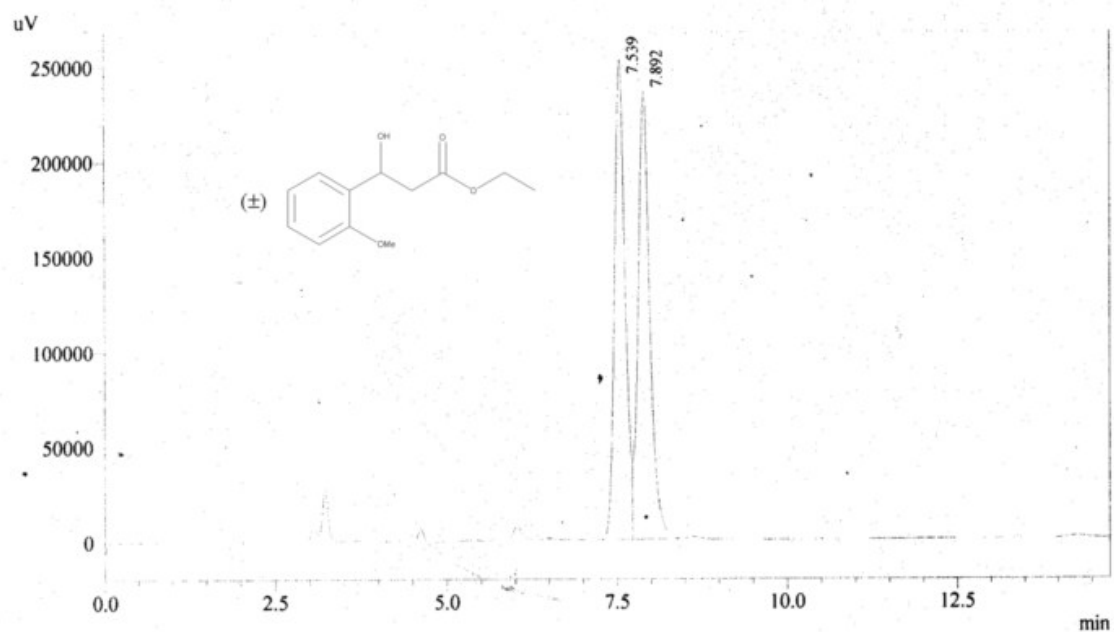

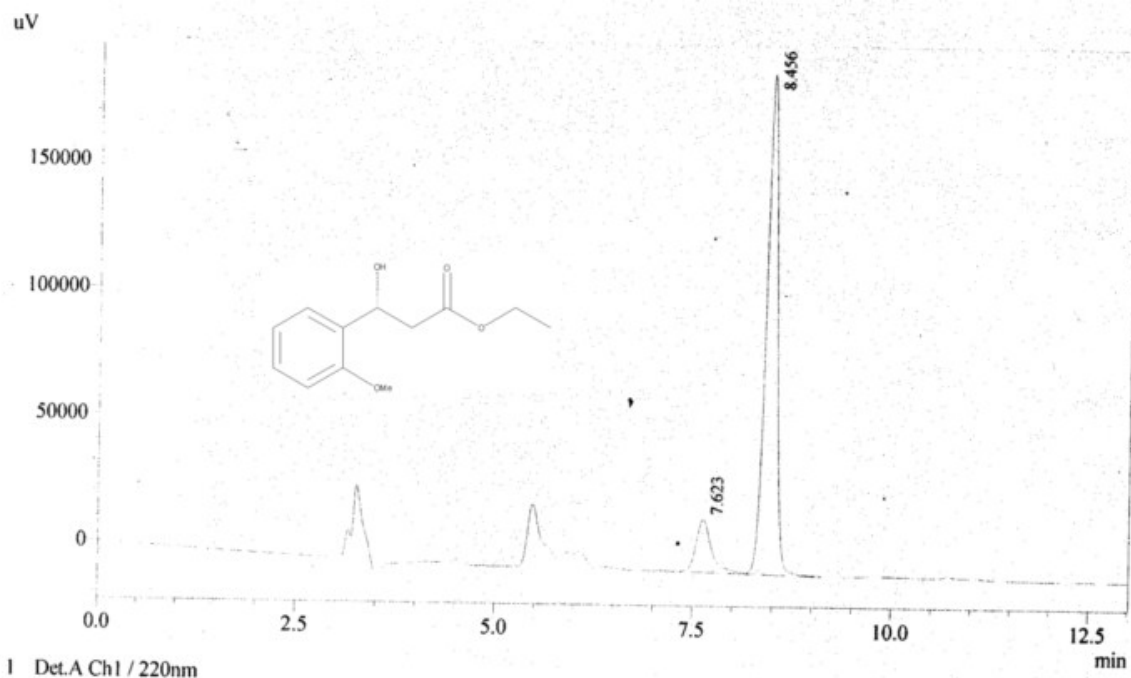

1 Det.A Ch1 / 220nm

Detector A Ch1 220nm

| Peak# | Ret. Time | Area    | Height | Area %  | Height % |
|-------|-----------|---------|--------|---------|----------|
| 1     | 7.623     | 282878  | 20888  | 12.751  | 9.579    |
| 2     | 8.456     | 1935632 | 197177 | 87.249  | 90.421   |
| Total |           | 2218510 | 218065 | 100.000 | 100.000  |

(R)-Ethyl 3-hydroxy-3-(3-methoxyphenyl)propanoate (9i)



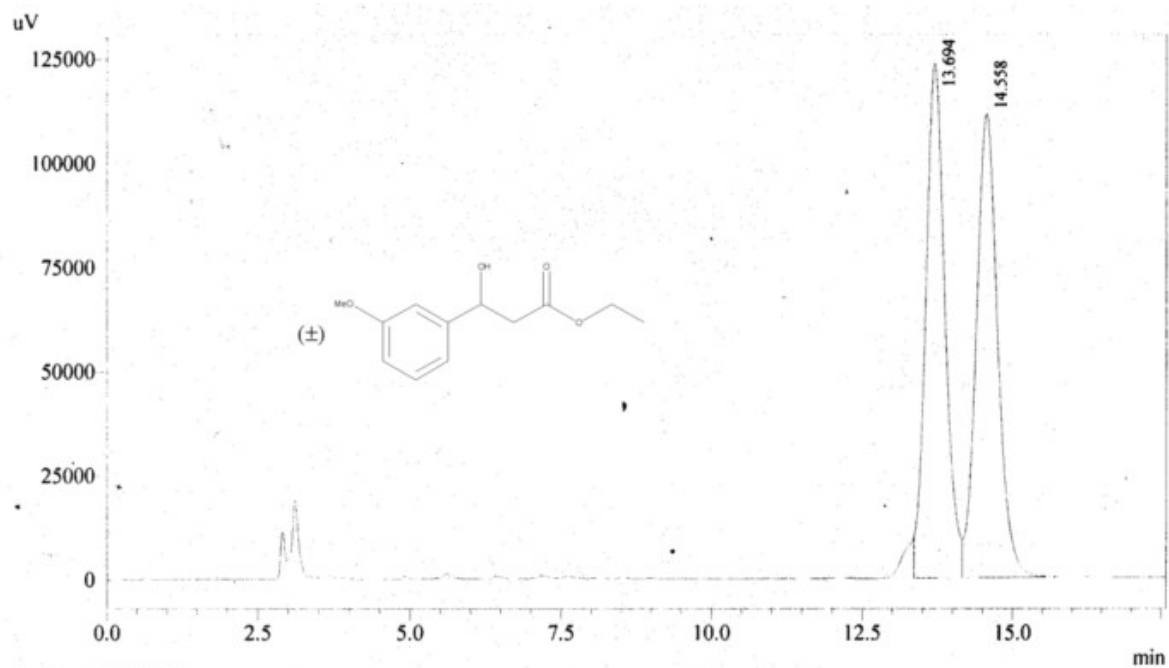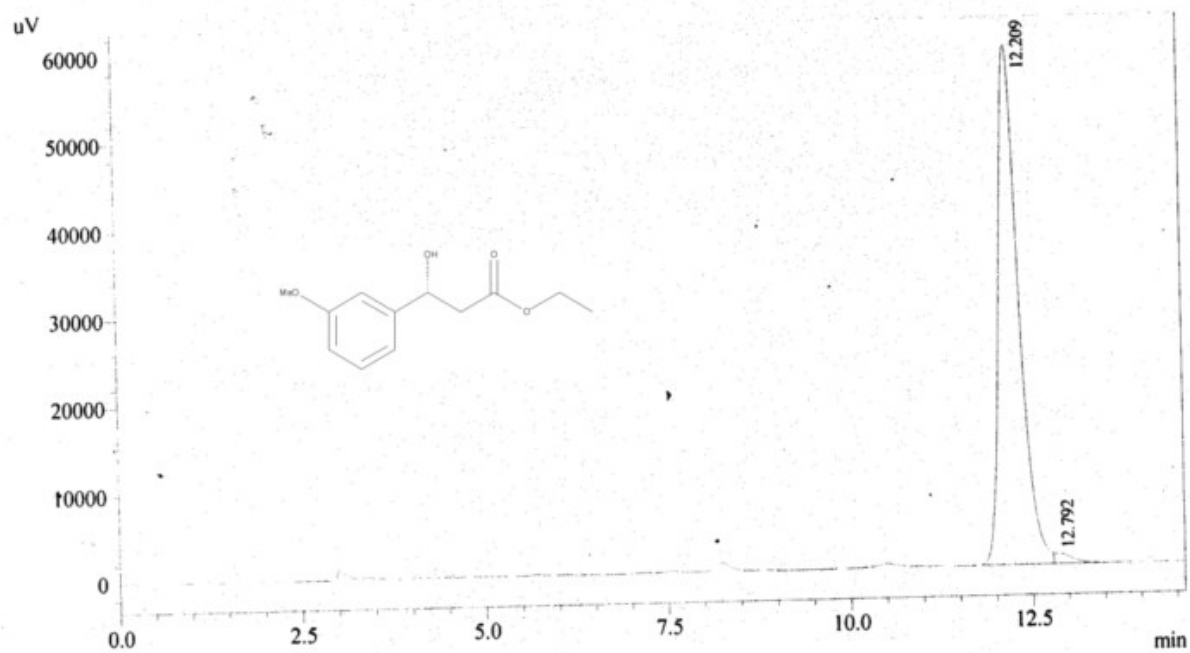

1 Det.A Ch1 / 220nm

| Peak# | Ret. Time | Area    | Height | Area %  | Height % |
|-------|-----------|---------|--------|---------|----------|
| 1     | 12.209    | 1150437 | 59293  | 98.269  | 97.996   |
| 2     | 12.792    | 20268   | 1213   | 1.731   | 2.004    |
| Total |           | 1170705 | 60506  | 100.000 | 100.000  |

(R)- Ethyl 3-hydroxy-3-(4- methylphenyl)propanoate (9j)

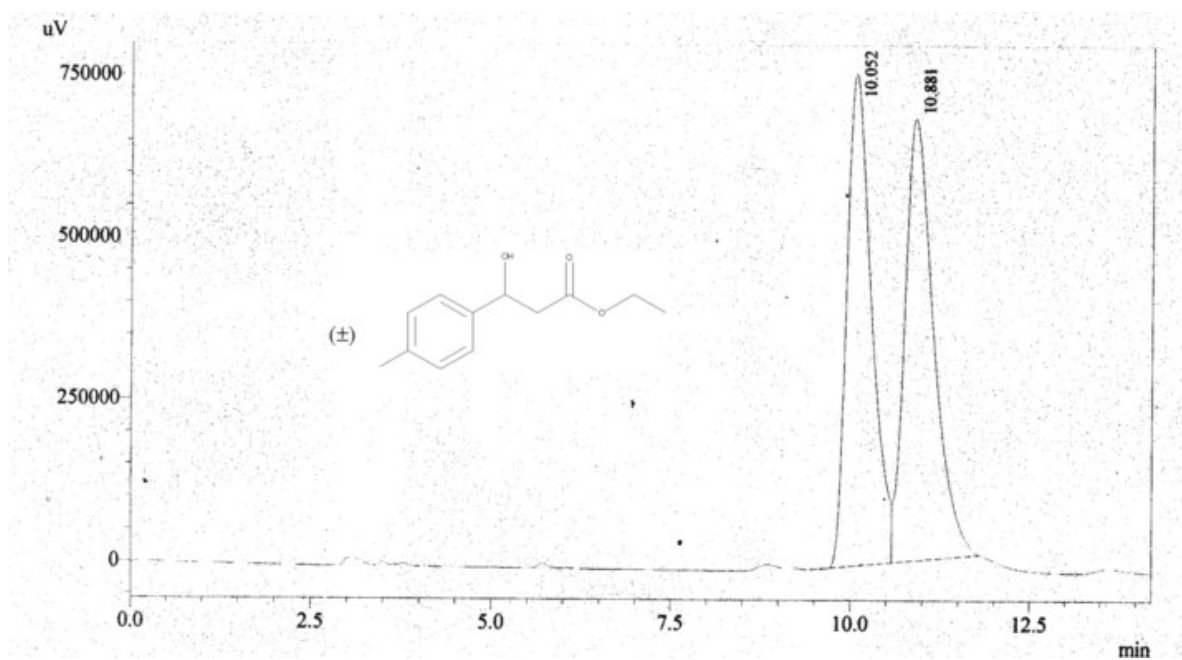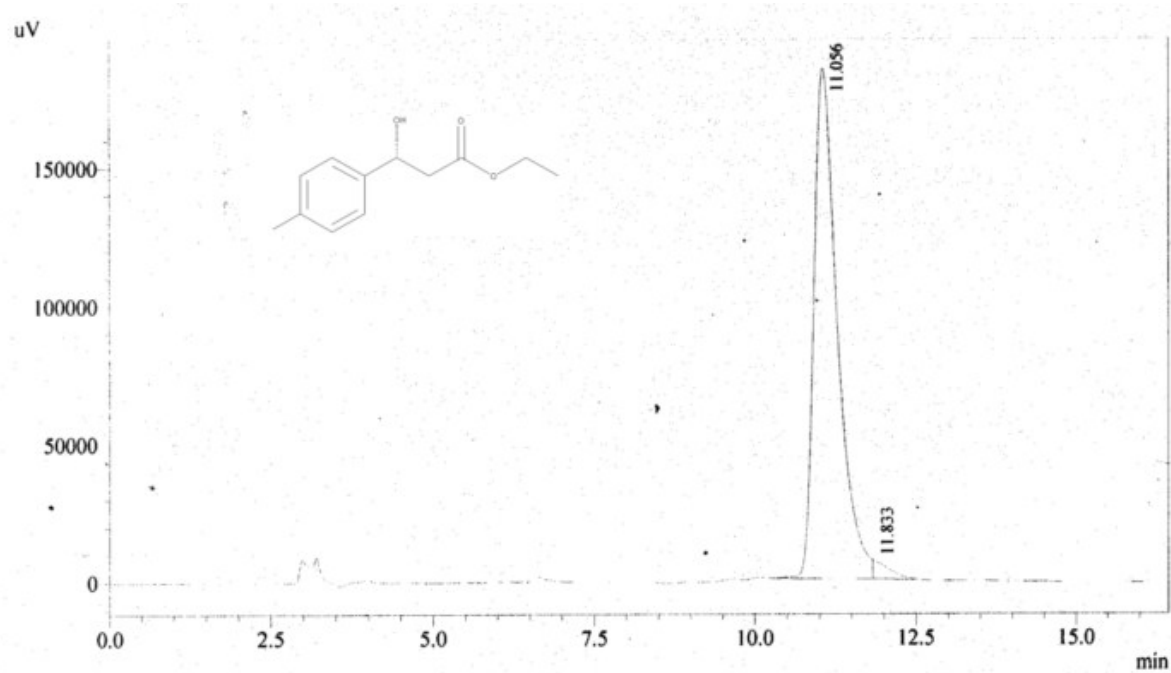

I Det.A ChI / 220nm

Detector A ChI 220nm

| Peak# | Ret. Time | Area    | Height | Area %  | Height % |
|-------|-----------|---------|--------|---------|----------|
| 1     | 11.056    | 4683139 | 184805 | 97.591  | 96.417   |
| 2     | 11.833    | 115611  | 6868   | 2.409   | 3.583    |
| Total |           | 4798750 | 191673 | 100.000 | 100.000  |

(R)- Ethyl 3-hydroxy-3-(2-naphthyl)propanoate (9k)

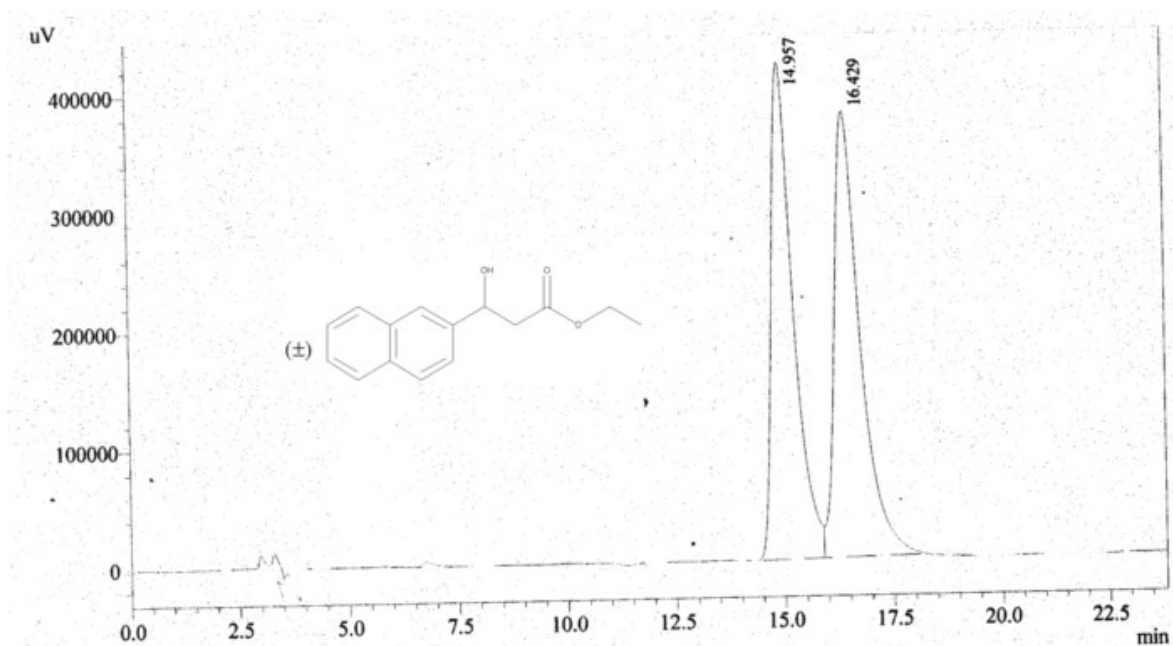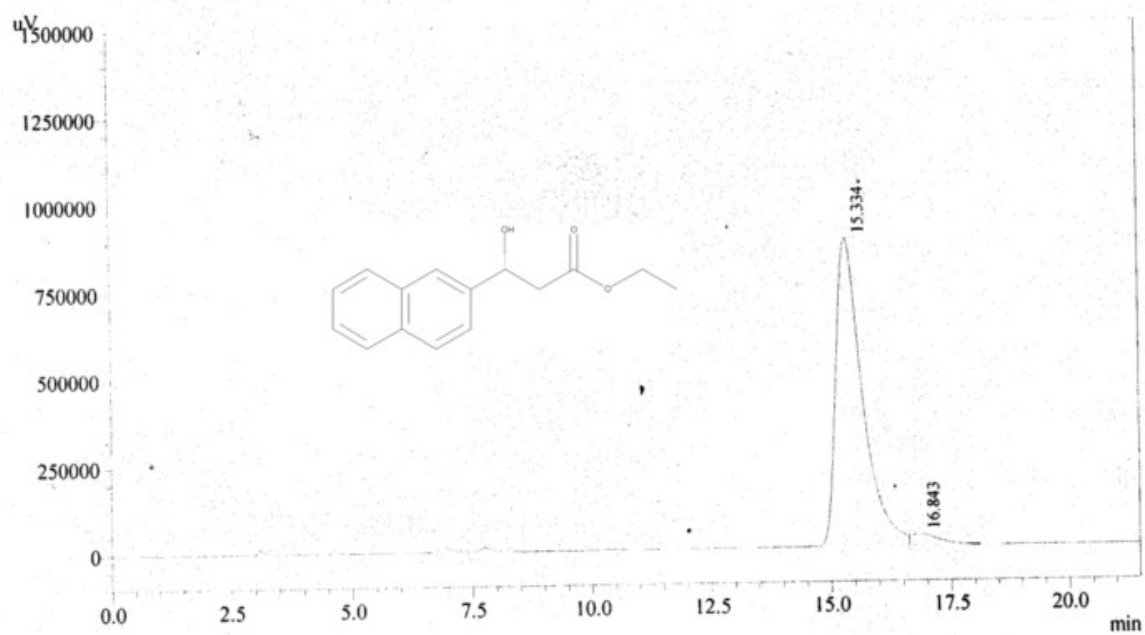

1 Det.A Ch1 / 220nm

| Peak# | Ret. Time | Area     | Height | Area %  | Height % |
|-------|-----------|----------|--------|---------|----------|
| 1     | 15.334    | 33836941 | 881426 | 96.394  | 96.454   |
| 2     | 16.843    | 1265653  | 32403  | 3.606   | 3.546    |
| Total |           | 35102593 | 913829 | 100.000 | 100.000  |

(R)- Ethyl 3-(2-furyl)-3-hydroxypropanoate (9l)

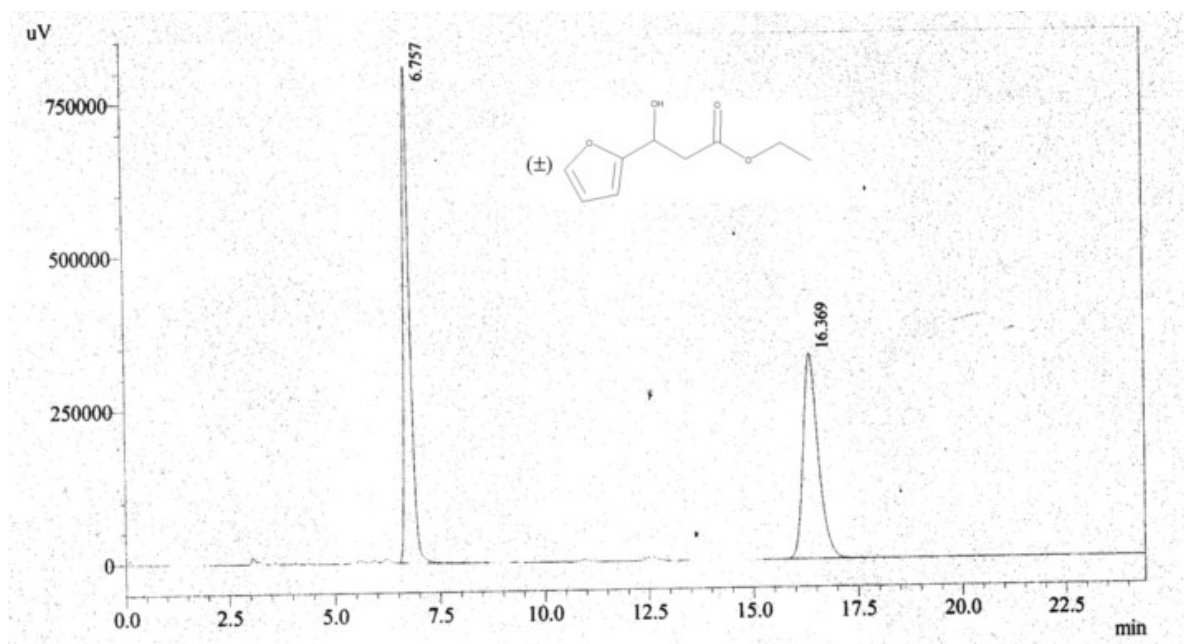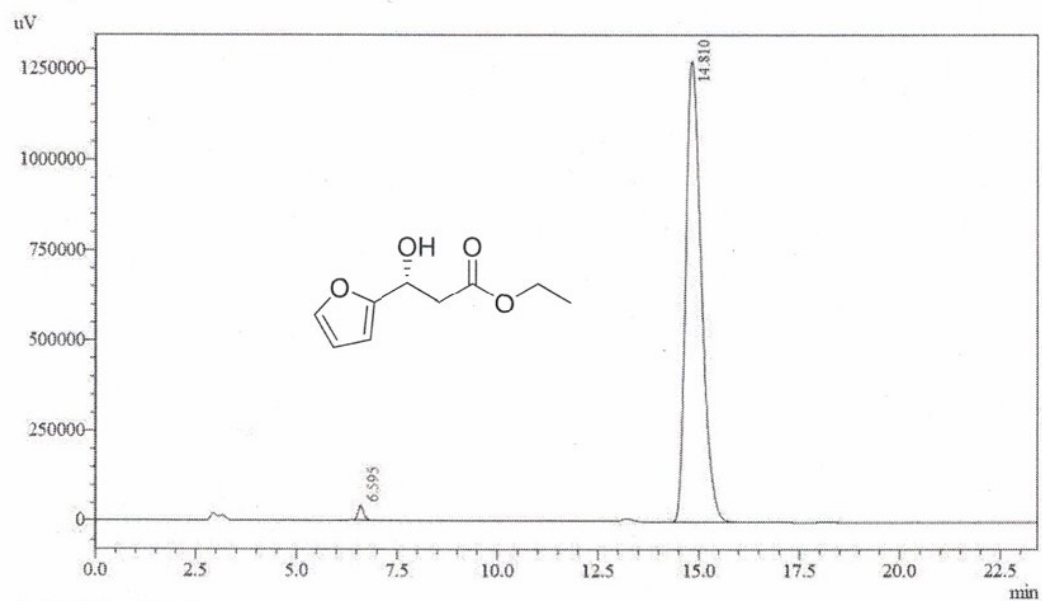

1 Det.A Ch1 / 220nm

Detector A Ch1 220nm

| Peak# | Ret. Time | Area     | Height  | Area %  | Height % |
|-------|-----------|----------|---------|---------|----------|
| 1     | 6.595     | 375310   | 39824   | 1.083   | 3.038    |
| 2     | 14.810    | 34291956 | 1270915 | 98.917  | 96.962   |
| Total |           | 34667266 | 1310739 | 100.000 | 100.000  |

(R)- Ethyl 3-hydroxy-3-(2-thienyl)propanoate (9m)

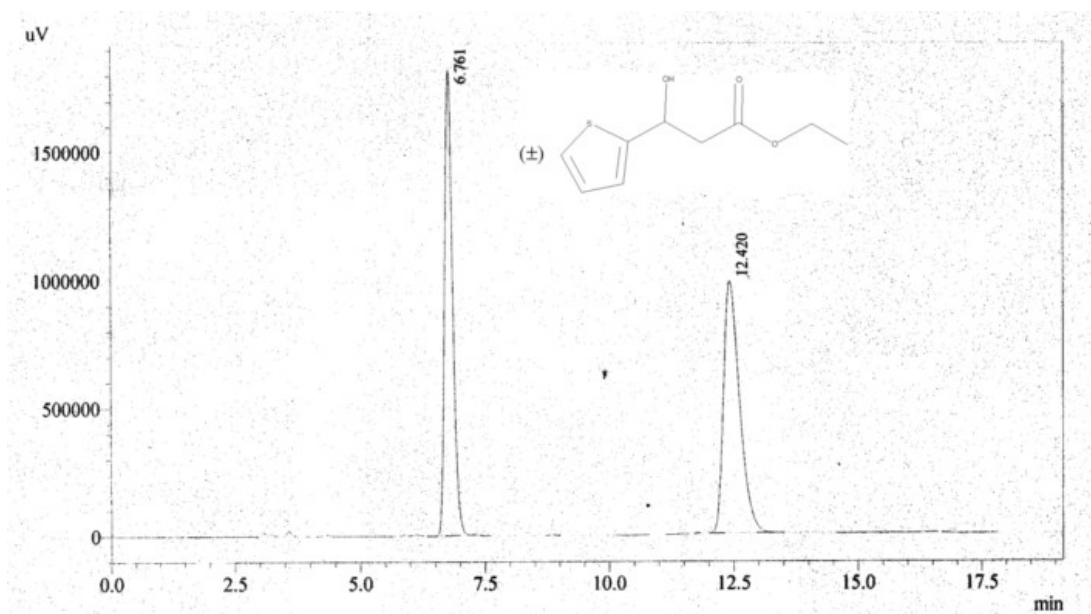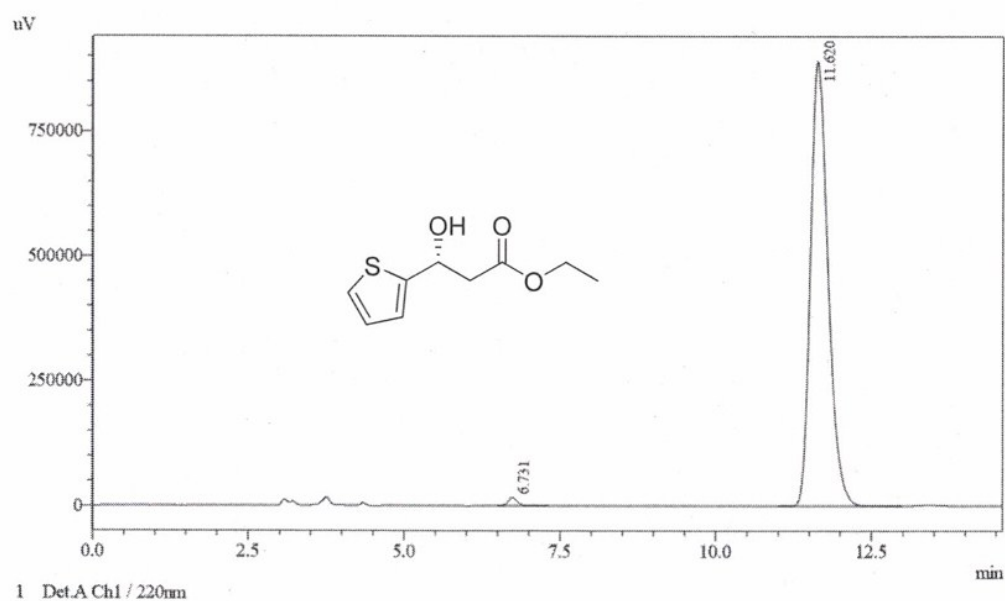

1 Det.A Ch1 / 220nm

Detector A Ch1 220nm

| Peak# | Ret. Time | Area     | Height | Area %  | Height % |
|-------|-----------|----------|--------|---------|----------|
| 1     | 6.731     | 167354   | 16643  | 1.336   | 2.144    |
| 2     | 11.620    | 12360273 | 890061 | 98.664  | 97.856   |
| Total |           | 12527626 | 906704 | 100.000 | 100.000  |

Ethyl 1-hydroxyindane-2-carboxylate (9n)

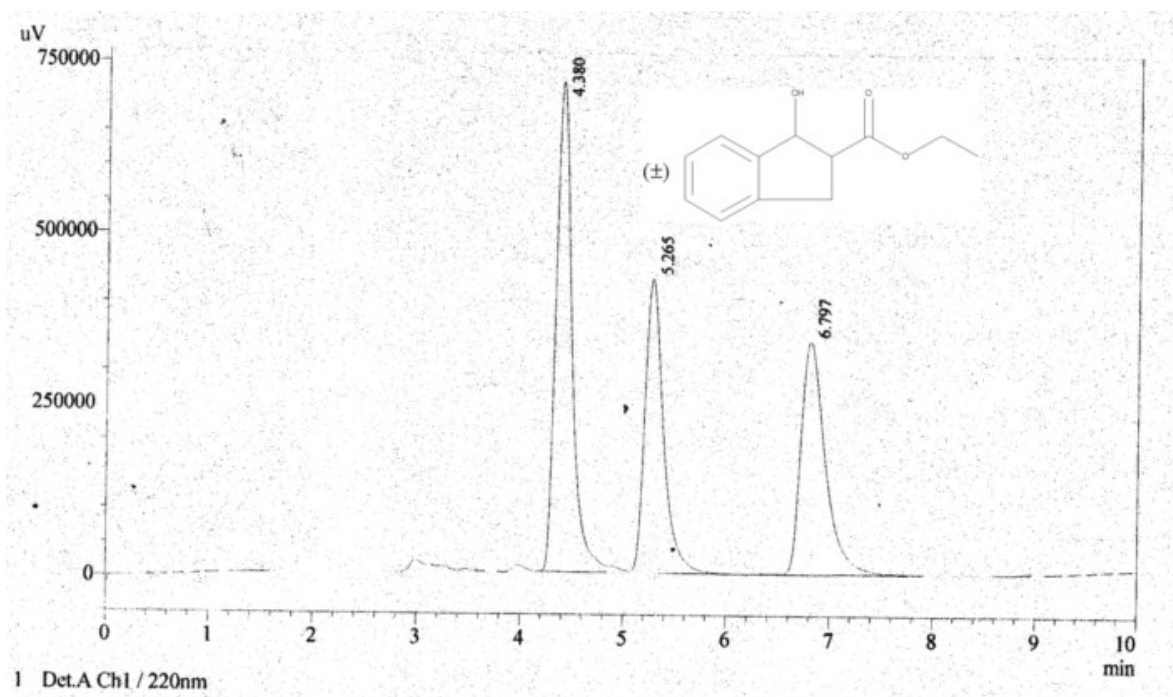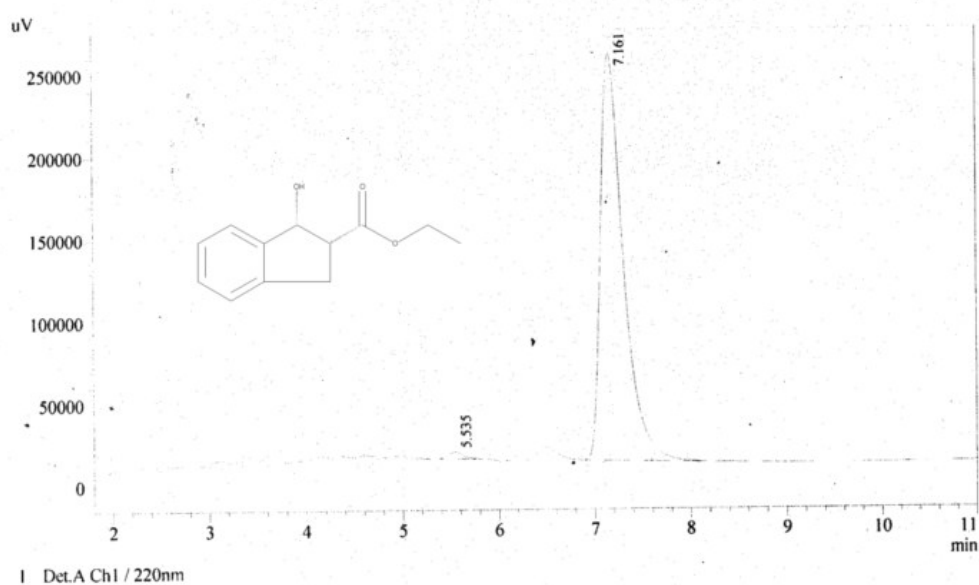

| Detector A Ch1 220nm |           |         |        |         |          |  |
|----------------------|-----------|---------|--------|---------|----------|--|
| Peak#                | Ret. Time | Area    | Height | Area %  | Height % |  |
| 1                    | 5.535     | 43787   | 4298   | 1.062   | 1.711    |  |
| 2                    | 7.161     | 4078458 | 246943 | 98.938  | 98.289   |  |
| Total                |           | 4122245 | 251241 | 100.000 | 100.000  |  |

Ethyl 1-hydroxytetraline-2-carboxylate (9o)

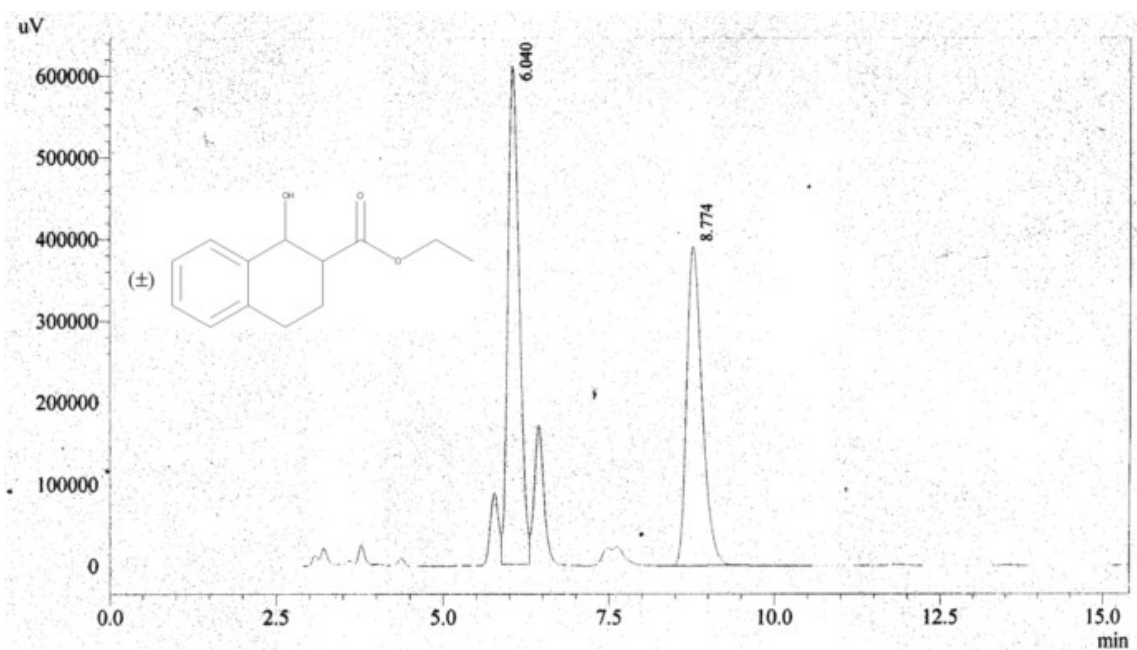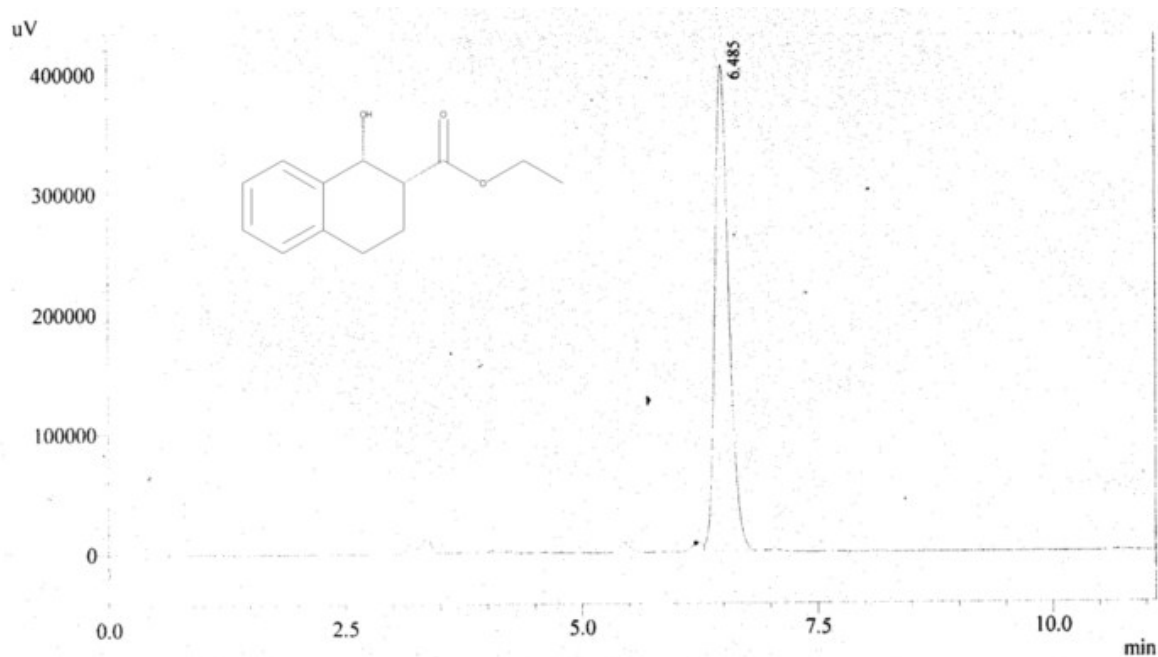

1 Det.A Ch1 / 220nm

Detector A Ch1 220nm

| Peak# | Ret. Time | Area    | Height | Area %  | Height % |
|-------|-----------|---------|--------|---------|----------|
| 1     | 6.485     | 4131261 | 404811 | 100.000 | 100.000  |
| Total |           | 4131261 | 404811 | 100.000 | 100.000  |
